# Supplementary material for: Cost-effectiveness of rapid laboratory-based mass-spectrometry diagnosis of bloodstream infection: evidence from the RAPIDO randomised controlled trial
Source: PubMed Central journal article supplement (PMC8524273; doi:10.1136/bmjopen-2020-044623), 2021-10-18
Supplement: bmjopen-2020-044623.draft_revisions.pdf [file bmjopen-2020-044623.draft_revisions.pdf]

# BMJ Open

BMJ Open is committed to open peer review. As part of this commitment we make the peer review history of every article we publish publicly available.

When an article is published we post the peer reviewers' comments and the authors' responses online. We also post the versions of the paper that were used during peer review. These are the versions that the peer review comments apply to.

The versions of the paper that follow are the versions that were submitted during the peer review process. They are not the versions of record or the final published versions. They should not be cited or distributed as the published version of this manuscript.

BMJ Open is an open access journal and the full, final, typeset and author-corrected version of record of the manuscript is available on our site with no access controls, subscription charges or pay-per-view fees (<http://bmjopen.bmj.com>).

If you have any questions on BMJ Open's open peer review process please email [info.bmjopen@bmj.com](mailto:info.bmjopen@bmj.com)

# BMJ Open

## Cost-effectiveness of rapid laboratory-based mass-spectrometry diagnosis of bloodstream infection: Evidence from the RAPIDO randomized controlled trial

|                               |                                                                                                                                                                                                                                                                                          |
|-------------------------------|------------------------------------------------------------------------------------------------------------------------------------------------------------------------------------------------------------------------------------------------------------------------------------------|
| Journal:                      | <i>BMJ Open</i>                                                                                                                                                                                                                                                                          |
| Manuscript ID                 | bmjopen-2020-044623                                                                                                                                                                                                                                                                      |
| Article Type:                 | Original research                                                                                                                                                                                                                                                                        |
| Date Submitted by the Author: | 10-Sep-2020                                                                                                                                                                                                                                                                              |
| Complete List of Authors:     | Dixon, Pdraig; Oxford University, Hollingworth, William; University of Bristol, School of Social and Community Medicine<br>Pike, Katie; Bristol University<br>Reynolds, Rosy; Bristol Medical School<br>Stoddart, Margaret; Southmead Hospital<br>MacGowan, Alasdair; Southmead Hospital |
| Keywords:                     | HEALTH ECONOMICS, Diagnostic microbiology < INFECTIOUS DISEASES, Infection control < INFECTIOUS DISEASES                                                                                                                                                                                 |
|                               |                                                                                                                                                                                                                                                                                          |

SCHOLARONE™  
Manuscripts

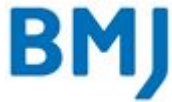

I, the Submitting Author has the right to grant and does grant on behalf of all authors of the Work (as defined in the below author licence), an exclusive licence and/or a non-exclusive licence for contributions from authors who are: i) UK Crown employees; ii) where BMJ has agreed a CC-BY licence shall apply, and/or iii) in accordance with the terms applicable for US Federal Government officers or employees acting as part of their official duties; on a worldwide, perpetual, irrevocable, royalty-free basis to BMJ Publishing Group Ltd ("BMJ") its licensees and where the relevant Journal is co-owned by BMJ to the co-owners of the Journal, to publish the Work in this journal and any other BMJ products and to exploit all rights, as set out in our [licence](#).

The Submitting Author accepts and understands that any supply made under these terms is made by BMJ to the Submitting Author unless you are acting as an employee on behalf of your employer or a postgraduate student of an affiliated institution which is paying any applicable article publishing charge ("APC") for Open Access articles. Where the Submitting Author wishes to make the Work available on an Open Access basis (and intends to pay the relevant APC), the terms of reuse of such Open Access shall be governed by a Creative Commons licence – details of these licences and which [Creative Commons](#) licence will apply to this Work are set out in our licence referred to above.

Other than as permitted in any relevant BMJ Author's Self Archiving Policies, I confirm this Work has not been accepted for publication elsewhere, is not being considered for publication elsewhere and does not duplicate material already published. I confirm all authors consent to publication of this Work and authorise the granting of this licence.

# Cost-effectiveness of rapid laboratory-based mass-spectrometry diagnosis of bloodstream infection: Evidence from the RAPIDO randomized controlled trial

Padraig Dixon<sup>1\*</sup>, William Hollingworth<sup>2</sup>, Katie Pike<sup>3</sup>, Rosy Reynolds<sup>2</sup>, Margaret Stoddart<sup>4</sup>,  
Alasdair MacGowan<sup>4,5</sup>

1 Nuffield Department of Primary Care Health Sciences, University of Oxford

2 Population Health Sciences, University of Bristol

3 Bristol Trials Centre (Clinical Trials and Evaluation Unit), University of Bristol

4 Infection Sciences, North Bristol NHS Trust, Bristol

5 School of Cellular and Molecular Medicine, University of Bristol

\*Corresponding author

Email: Padraig.Dixon@phc.ox.ac.uk

**Short title:** Cost-effectiveness of rapid bacteraemia identification

**Funding statement:** This report summarises independent research funded by the National Institute for Health Research (NIHR) under its Programme Grant for Applied Research (PGfAR RP-PG-0707-10043). The views and opinions expressed in this report are those of the authors and do not necessarily reflect those of the National Institute for Health Research (NIHR), the NHS or the Department of Health. The funder had no role in the conduct of the study, the writing of the manuscript or the decision to submit it for publication.

**Acknowledgements:** We are very grateful to all patients, health care professionals, and NHS staff who contributed time and effort to make the RAPIDO trial possible. We are grateful to administrative staff at trial sites for support with participant recruitment, data entry and trial administration. The RAPIDO trial was designed and delivered in collaboration with Clinical Trials

1  
2 and Evaluation Unit Bristol (CTEU), a UKCRC Registered Clinical Trials Unit in receipt of  
3  
4 National Institute for Health Research CTU support funding. RR acknowledges support from the  
5  
6 NIHR Health Protection Research Unit in Behavioural Science and Evaluation at University of  
7  
8 Bristol.  
9

10  
11 **Conflict of interest statement:** The authors declare no conflicts of interest.  
12

13  
14 **Ethics:** The RAPIDO trial was approved by the NRES Committee South West - Frenchay on 20  
15  
16 March 2012, reference 12/SW/003.  
17

18  
19 **Informed consent:** In order to initiate rapid diagnosis quickly, the study design required prompt  
20  
21 randomisation when blood cultures flagged positive, so it was necessary to seek consent  
22  
23 retrospectively. Further details are provided in the main text and in references to the main trial  
24  
25 publication.  
26

27  
28 **Key words:** Bloodstream infection, randomised controlled trial, MALDI-TOF, mass spectrometry,  
29  
30 cost-effectiveness.  
31

32  
33 **Word count:** 3,953  
34

35  
36  
37 The differences between arms in cost and effect were modest, associated with uncertainty, and  
38  
39 may not accurately reflect “real-world” routine use of MALDI-TOF technology in this patient  
40  
41 group.  
42  
43  
44  
45  
46  
47  
48  
49  
50  
51  
52  
53  
54  
55  
56  
57  
58  
59  
60

# Abstract

## Objectives and intervention

Bloodstream infection, the presence of viable microorganisms in the blood, is a prevalent clinical event associated with substantial mortality. Patient outcomes may be improved when the causative microorganism is identified quickly. We assessed the cost-effectiveness of rapid microbial identification by matrix-assisted laser desorption/ionisation time-of-flight (MALDI-TOF) mass spectrometry.

## Design

Economic evaluation alongside a randomised multicentre trial (RAPIDO: RAPId Diagnosis on Outcome) assessing the impact of rapid identification by MALDI-TOF spectrometry.

## Setting

Adult in-patients with bloodstream infections at seven NHS hospital trusts in England and Wales.

## Primary outcome

Net monetary benefit, estimated as incremental costs compared with incremental 28-day survival, of rapid identification by MALDI-TOF spectrometry compared to conventional identification.

## Methods

Patients were randomised (1:1) to receive diagnosis by conventional methods of microbial identification (conventional arm) only or by MALDI-TOF spectrometry in addition to conventional identification (RAPIDO arm).

## Results

Data from 5,550 patients were included in primary analysis. Mean imputed costs in 2018/19 prices per patient were lower by £126 in the RAPIDO arm (95% CI: -£784 to £532) but the proportion of patients alive at day 28 was lower (81.5% versus 82.3%). The probability of cost-

1  
2 effectiveness of MALDI-TOF was <0.5 at cost-effectiveness thresholds between £20,000 and  
3  
4 £50,000.  
5

## 6 7 **Conclusions** 8 9

10 Adjunctive MALDI-TOF diagnosis was unlikely to be cost-effective when measured as cost per  
11 death avoided at 28 days. However, the differences between arms in cost and effect were  
12 modest, associated with uncertainty, and may not accurately reflect “real-world” routine use of  
13 MALDI-TOF technology in this patient group.  
14  
15  
16  
17  
18  
19  
20  
21

22 Trial registration/reference: ISRCTN 97107018 / UKCRN 11978  
23  
24

## 25 **Strengths and limitations of this study** 26 27

28 We report an economic evaluation of the first randomized controlled trial of adjunctive matrix-  
29 assisted laser desorption/ionisation time of flight (MALDI-TOF) mass spectrometry identification  
30 of the causative microorganism in bloodstream infection.  
31  
32  
33

34 Data on 5,550 patients from the RAPIDO (RAPId Diagnosis on Outcome) trial were used to  
35 estimate the cost-effectiveness of MALDI-TOF in comparison to conventional microbiological  
36 methods.  
37  
38  
39  
40

41 The intervention was unlikely to be cost effective, but data on quality-adjusted life years and  
42 long-term data beyond 28 days were not available.  
43  
44  
45  
46  
47  
48  
49  
50  
51  
52  
53  
54  
55  
56  
57  
58  
59  
60

## Background

Bloodstream infection refers to the presence, confirmed by laboratory testing, of viable microorganisms in the bloodstream. These infections are both prevalent and clinically significant. There are estimated to be approximately 1.2 million annual episodes of bloodstream infection in Europe, 500,000 in North America <sup>1</sup>, and 100,000 in England and Wales <sup>2</sup>. Estimates of overall mortality range from 15-25% at 30 days post-infection to almost 50% at 12-36 months after infection <sup>3-6</sup>.

Rapid identification of the causative microbial pathogen may be associated with improved patient outcomes <sup>7 8</sup>. The RAPIDO trial assessed the impact of laboratory-based RAPID Diagnosis on Outcome of bloodstream infections in hospitalised adult patients at seven NHS Hospital Trusts in England and Wales <sup>2</sup>. Rapid diagnosis was by matrix-assisted laser desorption/ionisation time-of-flight (MALDI-TOF) mass spectrometry applied to machine-positive blood cultures. Here we report the results of an economic evaluation of this trial, from an NHS perspective. Its purpose was to estimate the cost-effectiveness of using MALDI-TOF technology in addition to conventional microbiological techniques compared to conventional approaches alone.

## Methods

Trial methods were described in MacGowan et al <sup>2</sup> and are summarised here.

### Design

RAPIDO was a multicentre prospective randomised (1:1) non-blinded parallel-group trial comparing two approaches to identification of the causative microorganism(s) of bloodstream infection in hospitalised adult patients at seven centres in England and Wales. The primary outcome was 28-day survival, and the two approaches were MALDI-TOF spectrometry in addition to conventional microbiological culture ('RAPIDO' arm) or conventional culture only ('Conventional' arm).

### Setting and participants

Adult patients aged  $\geq 18$  years, admitted to hospital for NHS care, and with a blood sample culture-positive for bacteria or fungi were potentially eligible for inclusion, whether or not the



1 organisms were considered clinically significant. Patients were not eligible if they were on an  
2  
3 end-of-life pathway, had been previously randomised in the study, were prisoners or young  
4  
5 offenders in the custody of the prison service, if the attending physician deemed them  
6  
7 unsuitable, or if the positive blood culture entered the diagnostic pathway 'out of hours' when  
8  
9 both MALDI-TOF and conventional identification methods were not equally available for use.  
10  
11 Patients were randomised on a 1:1 basis to either the Conventional or RAPIDO arm.  
12  
13  
14

15 In order to initiate rapid diagnosis quickly, the study design required prompt randomisation when  
16  
17 blood cultures flagged positive, so it was necessary to seek consent retrospectively. Research  
18  
19 nurses approached patients for consent when they were sufficiently recovered and had capacity,  
20  
21 in the opinion of both the clinical team and the research nurse. If a patient did not have capacity,  
22  
23 but was thought likely to regain it, then nurses waited for capacity to return. Otherwise, a relative  
24  
25 or close friend of the patient was approached as consultee, if available. If patients with capacity  
26  
27 were discharged to independent living before consent could be obtained, consent was sought by  
28  
29 post.  
30  
31  
32

### 33 Patient and public involvement

34 The public and patient panel involvement group for microbiology at North Bristol NHS Trust was  
35  
36 consulted on study design and the material given to patients.  
37  
38  
39

### 40 Intervention

41 Samples in both arms of the trial were tested by the conventional methods in routine use at the  
42  
43 microbiology laboratory of the centre concerned, starting with incubation in a blood culture  
44  
45 machine. Each laboratory's standard operating procedures defined the choice of appropriate  
46  
47 biochemical tests and antimicrobial panels, depending on all the information about the organism  
48  
49 available at the time.  
50  
51  
52

53 In the RAPIDO arm, samples were first also tested by MALDI-TOF mass spectrometry, which is  
54  
55 a relatively new technology for the identification of microbial organisms.<sup>9</sup> Identification may be  
56  
57 achieved within minutes, a much shorter time than for conventional identification.<sup>9</sup>  
58  
59  
60

## Data collection and outcomes

Research nurses and laboratory staff collected data on paper data capture forms for later entry to a web-based database. Detailed data collection lasted from day 0 to day 7 after blood sampling, or discharge or death if earlier, and continued until day 28 for the key outcomes of death, discharge and *C. difficile* infection, and for laboratory data if necessary.

Key clinical data relevant to the economic evaluation included dates of admission, blood sampling (date 0), discharge and death, allowing calculation of duration of stay both before and up to 28 days after the onset of bloodstream infection. All relevant antimicrobial prescriptions were recorded from day 0 to day 7 including drug names, doses, routes and frequencies of administration, and the number of doses actually taken on each day. Ward speciality was recorded for the ward where the patient spent most of each day up to day 7.

For the economic analysis, the trial's survival outcome was expressed as the proportion of patients alive at 28 days, so that the cost-effectiveness results could be interpreted as the incremental cost per percent change in the proportion of patients alive at 28 days.

### Measurement and valuation of resource use

The economic analysis took a health system (i.e. NHS) secondary-care perspective for costs.

The time horizon for the economic analysis was up to 28 days. Costs and outcomes were therefore not discounted. Costs were first calculated in 2012/13 prices to reflect the structure of relative costs within the NHS during the first year of participant recruitment into the RAPIDO RCT. These costs were then inflated to 2018/19 levels. Costs from 2012/13 to 2015/2016 were inflated using the hospital and community health services (HCHS) index<sup>10</sup>. This index was replaced in 2016 by the NHS cost inflation index (NHSCII) which was used to inflate prices from 2015/16 to the 2018/19 prices. Supplementary material contains results for the uninflated 2012/13 price levels.

The measured components of NHS costs in each arm were: diagnostic testing (reflecting differences in the technology randomly allocated for sample diagnosis); length of stay for initial

1 admission and ward type (reflecting different levels of intensity of clinical support); and  
2  
3 antimicrobials prescribed. Further details are available in the supplementary material.  
4  
5  
6

### 7 Diagnostic testing

8 Patients in both arms of the study had conventional diagnostic blood testing. The costs of the  
9 conventional approach to diagnosis are 'bundled' within NHS reference cost and tariffs  
10 categories for hospital admissions. To avoid double counting of these costs, the costs of  
11 conventional diagnosis were not separately calculated. The unit cost of identifying an organism  
12 directly from a machine-positive blood sample using MALDI-TOF was calculated using a  
13 microcosting exercise, described further in the supplementary material.  
14  
15  
16  
17  
18  
19  
20  
21

### 22 Length of stay and ward type

23 Data on the speciality of the ward on which patients were located was recorded up to the  
24 seventh day after the positive blood sample was taken. Unit costs by ward type are not provided  
25 in national data sources such as NHS Reference Costs.<sup>11</sup> The closest analogue in NHS  
26 Reference Costs is that of 'Service Description', which groups together related procedures. The  
27 coded ward specialities were therefore matched to the closest category of 'Service Description'  
28 contained in NHS Reference Costs.  
29  
30  
31  
32  
33  
34  
35  
36

37 For each Service Description, we calculated a per-day cost as the average of the costs for  
38 relevant currency codes (which combine patients with similar cost implications) weighted by the  
39 frequency of codes as reported in NHS Reference Costs. We also accounted for the  
40 remuneration of hospitals according to the length of stay of patients, and for differences in  
41 elective and non-elective care. Further details are provided in the supplementary information  
42 section.  
43  
44  
45  
46  
47  
48  
49  
50

51 We estimated ward costs between day seven (the last day at which ward type was recorded)  
52 and day 28 (the point at which the primary outcome of the RCT was measured) by a simple  
53 extrapolation. This involved assuming that, for those patients known to survive to at least day 7,  
54 that the day 7 ward type was the ward type on which patients were located until the earliest of  
55  
56  
57  
58  
59  
60

1  
2 discharge, death or day 28. We assess the sensitivity of the results to this assumption by  
3  
4 comparing the primary outcome to costs at 7 days.  
5  
6

### 7 Antimicrobial use

8 Antimicrobial drugs administered were costed to 2012/13 prices using the British National  
9 Formulary<sup>12</sup> and then inflated as with other costs to 2018/19. A per-patient, per-day  
10  
11 antimicrobial cost was calculated from the recorded prescriptions and number of doses taken  
12  
13 each day.  
14  
15  
16

### 17 **Analytical methods**

18 We adopted an intention-to-treat approach to analysis, in which all costs and outcomes were  
19  
20 analysed according to the diagnostic pathway to which participants' samples were randomised,  
21  
22 rather than the pathway actually followed. All analysis was conducted using Stata version 15.1  
23  
24 (StataCorp, College Station, Texas, USA).  
25  
26  
27

### 28 Imputation of missing data

29 The amount of missing data was modest for patients who provided consent. Mortality data at 28  
30  
31 days was available for all but two patients. Information on allocation was complete. Data  
32  
33 necessary to cost ward stays was incomplete in 4% of cases, and in 12% of cases for  
34  
35 antimicrobials. Logistic regression analysis confirmed that for each cost category this  
36  
37 missingness was unrelated to randomised allocation; odds ratios (95% confidence intervals) for  
38  
39 missing ward and antimicrobial data were 1.09 (0.80 to 1.49) and 0.93 (0.79 to 1.09),  
40  
41 respectively. We used mean imputation, stratified by allocation, in order to include these data  
42  
43 points in the complete case analysis.  
44  
45  
46  
47

48  
49 Our base-case analysis used multiple imputation. Of the 5,550 patients in the analysis  
50  
51 population, 19.5% (n=1,082) were eligible but unapproached survivors. Only very limited  
52  
53 baseline information was available for these patients, in accordance with the ethical approvals  
54  
55 received, but their mortality outcome was known. Our base-case analysis used multiple  
56  
57 imputation to estimate the 28-day and 7-day costs of the 1,082 unapproached survivors.  
58  
59  
60

1  
2 Multiple imputation by chained equations was implemented in Stata 15.1 using the `–ice –`  
3  
4 command.<sup>13 14</sup> The imputation model was stratified by trial arm and included all variables for  
5  
6 which there was complete information on the 5,550 analysis sample patients (centre, sex, age,  
7  
8 and consent status) and total cost at 7 and 28 days for available cases. We also included the 28-  
9  
10 day mortality outcome. We assumed that the two patients for whom the mortality outcome was  
11  
12 censored before day 28 had died by day 28. Predictive mean matching<sup>13</sup> was used to allow for  
13  
14 non-normal distributions of the cost variables. Costs were imputed at the level of 7- and 28-day  
15  
16 costs, rather than for the underlying disaggregated components of these costs. The number of  
17  
18 imputations (n=30) was selected to be larger than 100 times the proportion of missing data.<sup>13</sup> We  
19  
20 reflected variation within and between the imputed datasets in the analysis using the methods  
21  
22 described by Faria et al.<sup>15</sup>  
23  
24  
25

### 26 Cost-effectiveness analysis

27  
28 Cost-effectiveness parameters were calculated parametrically from the output of seemingly  
29  
30 unrelated regressions in which NHS costs and then the proportion of patients alive at 28 days  
31  
32 were regressed on a binary treatment indicator and indicators for trial centre.  
33  
34

35  
36 In the absence of a survival or mortality-specific threshold, we estimated net monetary benefit  
37  
38 (NMB) at a range of threshold values (£5,000, £10,000, £20,000, £30,000 and £50,000 per  
39  
40 death avoided at 28 days). To quantify uncertainty, we calculated confidence intervals around  
41  
42 point estimates of net benefit, and constructed cost-effectiveness acceptability curves.  
43  
44

45  
46 We undertook a number of sensitivity analyses. We calculated net benefit excluding the group of  
47  
48 eligible but unapproached survivor patients. We also calculated cost-effectiveness at seven days  
49  
50 (rather than 28) with and without this group of patients in order to assess whether our findings in  
51  
52 the base-case were substantially affected by our extrapolation of ward costs beyond day 7 for  
53  
54 participants surviving to this point.  
55

### 56 Subgroup analysis

57  
58 We undertook one pre-specified subgroup analysis to examine the clinical significance of the  
59  
60 infection episode. A positive blood culture may reflect the presence of pathogenic organisms

1  
2 multiplying in the patient's bloodstream (clinically significant infection), or an incidental  
3  
4 contamination of the blood sample during blood sampling or laboratory processing (not clinically  
5  
6 significant).

7  
8  
9 We followed the regression-based methods for subgroup analysis set out by Willan et al.<sup>16</sup> by  
10  
11 introducing a factorial subgroup/allocation interaction into the cost and effect equations. This  
12  
13 analysis necessarily excluded the unapproached survivor group for whom information on clinical  
14  
15 significance was unavailable.

## 16 17 18 **Results**

19  
20 A total of 14,298 samples were presented for screening as first machine-positive samples from  
21  
22 adult patients during the study period. From this total, 5,670 samples were excluded as  
23  
24 occurring out-of-hours and the remaining 8,628 samples were randomised to either RAPIDO  
25  
26 (n=4,312) or Conventional identification (n=4,316). Excluding those who were ineligible or  
27  
28 declined consent resulted in an analysis population of 5,550 patients (2,740 RAPIDO, 2,810  
29  
30 Conventional). An unexpectedly large group of patients survived to at least day 28 but were not  
31  
32 approached for consent because they lacked capacity and no suitable consultee could be found  
33  
34 for them. The analysis population of 5,550 included 1,082 eligible but unapproached survivors  
35  
36 (543 RAPIDO, 539 Conventional).

## 37 38 39 Outcomes

40  
41 A slightly higher proportion of patients died by 28 days in the RAPIDO group (18.5% or  
42  
43 508/2,470) than in the Conventional group (17.7% or 497/2,810). The hazard ratio (calculated  
44  
45 from Cox proportional hazards regression) was 1.05 (95% CI: 0.93 to 1.19, p=0.42). Median  
46  
47 time to discharge (up to 28 days) was 15 days in both arms (hazard ratio=0.98; 95% CI: 0.90 to  
48  
49 1.06).

50  
51  
52  
53 There was limited deviation from the protocol with respect to diagnostic pathway: the correct  
54  
55 diagnostic pathway was not followed for 6.1% of patients in the intervention arm (133/2196) and  
56  
57 2.1% in the control arm (48/2271).

## Costs

Costs from available cases, after mean imputation but before multiple imputation, are presented in *Table 1*. Costs are similar between arms, with the intervention having slightly lower total costs (the sum of intervention, antimicrobial and ward costs) at 7 and 28 days.

Table 1 Costs in available cases

| Mean cost           | Control<br>(N=2,271) | RAPIDO<br>(N=2,197) | Difference (95% CI) <sup>a</sup> |                 |
|---------------------|----------------------|---------------------|----------------------------------|-----------------|
| Intervention cost   | -                    | £7                  | +£7                              |                 |
| Antimicrobial cost  | £272                 | £292                | +£18                             | (-£6 to £46)    |
| 7-day ward costs    | £3,805               | £3,757              | -£49                             | (-£182 to £85)  |
| Total 7-day costs   | £4,077               | £4,055              | -£22                             | (-£163 to £112) |
| 28-day ward costs   | £9,325               | £9,282              | -£43                             | (-£557 to £471) |
| Total 28-days costs | £9,597               | £9,580              | -£17                             | (-£537 to £503) |

**Note:** <sup>a</sup> Confidence intervals around mean differences calculated from unadjusted linear regression

Estimated costs following multiple imputation are presented in *Table 2*.

Table 2 Costs following multiple imputation (based on 30 imputed datasets of N=5,550)

| Mean cost           | Control<br>(N=2,810) | RAPIDO<br>(N=2,740) | Difference (95% CI) <sup>a</sup> |                 |
|---------------------|----------------------|---------------------|----------------------------------|-----------------|
| Total 7-day costs   | £3,667               | £3,576              | -£82                             | (-£321 to £157) |
| Total 28-days costs | £8,253               | £8,139              | -£114                            | (-£773 to £545) |

**Note:** <sup>a</sup> Confidence intervals around mean differences calculated from unadjusted linear regression

## Cost-effectiveness and sensitivity analysis

In the base-case imputed analysis, estimated mean costs per patient were lower in the RAPIDO arm (mean difference -£126; 95% CI: -£784 to £532), and the proportion of patients alive at day 28 was also lower (81.4% vs 82.3%, see *Table 3*). Ward costs, including the costs of conventional microbiological testing, constituted 97% of total costs in each arm. Most of the remaining 3% of total cost was attributable to antimicrobial costs. The estimated per-patient cost of diagnosis using MALDI-TOF constituted a negligible proportion of overall per-patient mean costs in the intervention arm.

Table 3 Costs and outcome: base-case analysis with imputation (N=5,550)

|  | Control | RAPIDO | Difference (95% CI) |
|--|---------|--------|---------------------|
|  |         |        |                     |

|                              |         |        |                          |
|------------------------------|---------|--------|--------------------------|
| Mean 28-day NHS costs        | £ 8,259 | £8,113 | -£126 (-£784 to £532)    |
| 28-day survival <sup>a</sup> | 0.823   | 0.814  | -0.009 (-0.029 to 0.011) |

**Note:** <sup>a</sup>Survival measured as the proportion of patients alive at day 28.

Table 4 Cost-effectiveness: base-case analysis with imputation (N=5,550)

| Threshold <sup>a</sup> | Net monetary benefit (95% CI) | Probability of cost-effectiveness |
|------------------------|-------------------------------|-----------------------------------|
| £5,000                 | £83 (-£567 to £733)           | 0.59                              |
| £10,000                | £40 (-£625 to £706)           | 0.55                              |
| £20,000                | -£45 (-£783 to £692)          | 0.45                              |
| £30,000                | -£131 (-£984 to £721)         | 0.38                              |
| £50,000                | -£303 (-£1,460 to £855)       | 0.30                              |

**Note:** <sup>a</sup>Threshold value = 28-day cost per death avoided at 28 days.

The probability of the RAPIDO intervention being cost-effective declines with increasing threshold values of cost per death avoided at 28 days, as shown in

Figure 1 and Table 4.

Figure 1 Cost-effectiveness acceptability curve for base case

Table 5 and Table 6 report the results of the various sensitivity analyses. These analyses, expressed as net monetary benefit (with associated 95% confidence intervals), do not differ substantially from the base-case results. Estimating costs at seven rather than 28 days did not alter the overall cost-effectiveness conclusions.

### Subgroup analysis

Table 7 and Table 8 present the results of the subgroup analysis comparing clinically significant and clinically non-significant episodes of bloodstream infection. Statistical tests for interaction showed no evidence of a subgroup effect (p-value for interaction in the cost seemingly unrelated regression equation=0.32, p-value in the outcome seemingly unrelated regression equation =0.66), and estimates of difference between Conventional and RAPIDO diagnosis in both outcome and costs were broadly similar for the clinically significant and clinically non-significant subgroups.



1  
2  
3  
4  
5  
6  
7  
8  
9  
10  
11  
12  
13  
14  
15  
16  
17  
18  
19  
20  
21  
22  
23  
24  
25  
26  
27  
28  
29  
30  
31  
32  
33  
34  
35  
36  
37  
38  
39  
40  
41  
42  
43  
44  
45  
46  
47  
48  
49  
50  
51  
52  
53  
54  
55  
56  
57  
58  
59  
60

For peer review only

Table 5 Sensitivity analysis: costs and outcome

|                                  |            | Excluding unapproached survivors,<br>N=4,468, cost at 28 days |                    | Excluding unapproached survivors,<br>N=4,468, cost at 7 days |                    | Including unapproached survivors,<br>N=5,550, cost at 7 days |                    |
|----------------------------------|------------|---------------------------------------------------------------|--------------------|--------------------------------------------------------------|--------------------|--------------------------------------------------------------|--------------------|
| NHS costs<br>mean (95% CI)       | Control    | £9,604                                                        | (£9,243 to £9,967) | £4,079                                                       | (£3,982 to £4,117) | £3,669                                                       | (£3,500 to £3,836) |
|                                  | RAPIDO     | £9,572                                                        | (£9,204 to £9,441) | £4,053                                                       | (£3,953 to £4,153) | £3,574                                                       | (£3,378 to £3,770) |
|                                  | Difference | -£33                                                          | (-£549 to £484)    | -£26                                                         | (-£166 to £113)    | -£95                                                         | (-£358 to £168)    |
| 28-day survival<br>mean (95% CI) | Control    | 0.78                                                          | (0.76 to 0.80)     | 0.78                                                         | (0.76 to 0.80)     | 0.82                                                         | (0.81 to 0.84)     |
|                                  | RAPIDO     | 0.77                                                          | (0.75 to 0.79)     | 0.77                                                         | (0.75 to 0.79)     | 0.81                                                         | (.80 to 0.83)      |
|                                  | Difference | -0.01                                                         | (-0.04 to 0.01)    | -0.01                                                        | (-0.04 to -0.01)   | -0.01                                                        | (-0.03 to 0.01)    |

Table 6 Sensitivity analysis: cost effectiveness

| Threshold <sup>a</sup> | Excluding unapproached survivors, N=4,468, cost<br>at 28 days |                   |                  | Excluding unapproached survivors,<br>N=4,468, cost at 7 days |                   |      | Including unapproached survivors, N=5,550, cost at<br>7 days |                   |      |
|------------------------|---------------------------------------------------------------|-------------------|------------------|--------------------------------------------------------------|-------------------|------|--------------------------------------------------------------|-------------------|------|
|                        | NMB                                                           | (95% CI)          | PCE <sup>b</sup> | NMB                                                          | (95% CI)          | PCE  | NMB                                                          | (95% CI)          | PCE  |
| £5,000                 | -£29                                                          | (-£533 to £475)   | 0.46             | -£35                                                         | (-£206 to £136)   | 0.34 | £52                                                          | (-£222 to £326)   | 0.65 |
| £10,000                | -£91                                                          | (-£611 to £430)   | 0.37             | -£97                                                         | (-£359 to £165)   | 0.23 | £9                                                           | (-£314 to £332)   | 0.52 |
| £20,000                | -£214                                                         | (-£841 to £414)   | 0.25             | -£220                                                        | (-£706 to £267)   | 0.19 | -£77                                                         | (-£551 to £398)   | 0.38 |
| £30,000                | -£337                                                         | (-£1,135 to £461) | 0.20             | -£343                                                        | (-£1,067 to £381) | 0.18 | -£163                                                        | (-£817 to £492)   | 0.31 |
| £50,000                | -£583                                                         | (-£1799 to -£634) | 0.17             | -£589                                                        | (-£1,796 to £618) | 0.17 | -£334                                                        | (-£1,373 to £705) | 0.26 |

**Notes:** <sup>a</sup>Threshold value = cost per death avoided at 28 days; <sup>b</sup>NMB = net monetary benefit [mean (95% confidence interval)]; <sup>c</sup>PCE = probability of cost-effectiveness at given threshold.

Table 7 Subgroup analysis: costs and outcome

|                                   |            | All (unapproached survivors excluded)<br>N=4,468 |                    | Clinically significant episodes only<br>N=3,010 (67%) |                     | Clinically non-significant episodes only<br>N=1,458 (33%) |                     |
|-----------------------------------|------------|--------------------------------------------------|--------------------|-------------------------------------------------------|---------------------|-----------------------------------------------------------|---------------------|
| 28-day NHS costs<br>mean (95% CI) | Control    | £9,604                                           | (£9,243 to £9,967) | £9,456                                                | (£8,991 to £9,922)  | £9,451                                                    | (£8,786 to £10,116) |
|                                   | RAPIDO     | £9,572                                           | (£9,204 to £9,441) | £9,618                                                | (£9,134 to £10,102) | £9,047                                                    | (£8,399 to £9,696)  |
|                                   | Difference | -£33                                             | (-£549 to £484)    | £161                                                  | (-£469 to £791)     | -£404                                                     | (-£1,308 to £501)   |
| 28-day survival<br>mean (95% CI)  | Control    | 0.78                                             | (0.76 to 0.80)     | 0.78                                                  | (0.76 to 0.79)      | 0.80                                                      | (0.77 to 0.83)      |
|                                   | RAPIDO     | 0.77                                             | (0.75 to 0.79)     | 0.77                                                  | (0.75 to 0.79)      | 0.78                                                      | (0.75 to 0.81)      |
|                                   | Difference | -0.01                                            | (-0.04 to 0.01)    | -0.01                                                 | (-0.04 to 0.02)     | -0.02                                                     | (-0.06 to 0.02)     |

Table 8 Subgroup analysis: cost effectiveness at 28 days

| Threshold<br>value <sup>a</sup> | All (unapproached survivors excluded) N=4,468 |                   |                  | Clinically significant episodes only N=3,010 (67%) |                     |      | Clinically non-significant episodes only N=1,458<br>(33%) |                     |      |
|---------------------------------|-----------------------------------------------|-------------------|------------------|----------------------------------------------------|---------------------|------|-----------------------------------------------------------|---------------------|------|
|                                 | NMB <sup>b</sup>                              | (95% CI)          | PCE <sup>c</sup> | NMB                                                | (95% CI)            | PCE  | NMB                                                       | (95% CI)            | PCE  |
| £5,000                          | -£29                                          | (-£533 to £475)   | 0.46             | -£206                                              | (-£853 to £441)     | 0.27 | £301                                                      | (-£629 to £1,231)   | 0.74 |
| £10,000                         | -£91                                          | (-£611 to £430)   | 0.37             | -£250                                              | (-£947 to £446)     | 0.24 | £198                                                      | (-£803 to £1,199)   | 0.65 |
| £20,000                         | -£214                                         | (-£841 to £414)   | 0.25             | -£339                                              | (-£1,206 to £527)   | 0.22 | -£9                                                       | (-£1,254 to £1,237) | 0.49 |
| £30,000                         | -£337                                         | (-£1,135 to £461) | 0.20             | -£428                                              | (-£1,521 to £664)   | 0.22 | -£215                                                     | (-£1,785 to £1,355) | 0.39 |
| £50,000                         | -£583                                         | (-£1799 to -£634) | 0.17             | -£606                                              | (-£2,222 to £1,010) | 0.23 | -£627                                                     | (-£2,949 to £1,694) | 0.30 |

<sup>a</sup>Threshold value = cost per death avoided at 28 days; <sup>b</sup>NMB = net monetary benefit [mean (95% confidence interval)]; <sup>c</sup>PCE = probability of cost-effectiveness at given threshold.

## Discussion

Bloodstream infections are significant, prevalent clinical events associated with substantial morbidity, <sup>1</sup> mortality <sup>17</sup> and medical cost.<sup>18</sup> There are an estimated 1.2 million episodes of bloodstream infection and 157,000 associated deaths per year in Europe.<sup>1</sup> Identification of the aetiological agent is a critical step in the treatment of bloodstream infection. We performed a within-trial economic evaluation of MALDI-TOF diagnostic technology for the rapid identification of the causative microbial agent in hospitalised patients with bloodstream infection.

The primary analysis showed that the intervention was not likely to be cost-effective, measured using incremental cost and incremental 28-day survival. However, the differences between arms were modest and associated with considerable uncertainty. It is important therefore to reflect on whether the use of this technology outside trial conditions might alter the conclusions of the within-trial evaluation.

One consideration is that a higher MALDI-TOF throughput of machine-positive blood samples would reduce the overall cost per sample in the intervention arm. A value for the number of samples likely to be encountered in routine use was not included in the unit cost calculation in this study because of the exclusion criteria used in the trial: for example, it considered only samples from patients aged 18 and over. A reduction in the direct cost of MALDI-TOF would lower the intervention cost towards that of conventional diagnosis, but would not change patient outcomes.

Our economic evaluation did not calculate the cost of per-sample of conventional identification separately, since such costs are bundled into the ward stay costs and their inclusion would have amounted to double counting. By contrast, the intervention arm involved the use of MALDI-TOF in addition to conventional diagnosis, and hence the per-sample costs of MALDI-TOF are incremental to costs in the control arm. However, as MALDI-TOF has been increasingly adopted in routine practice, experience shows that it is not, in fact, used as an adjunct to conventional approaches, but largely displaces them. In addition, its widespread adoption for use with

1  
2 samples from much more common infections (e.g. urinary tract infections) reduces its per-  
3  
4 sample costs overall.  
5

6  
7 As a rough indication of the possible magnitudes of displacement that could be involved  
8  
9 specifically for blood cultures, MALDI-TOF offered a usable identification of some 83% of first-  
10  
11 bottle samples in the trial, and few of these samples would merit conventional identification in  
12  
13 addition. Of the remaining 17% of samples, it is likely that, after further culture to produce  
14  
15 colonial isolates, most would be successfully tested by MALDI-TOF without recourse to  
16  
17 conventional biochemical methods.  
18

19  
20 Other considerations suggest that the incremental cost of MALDI-TOF compared to conventional  
21  
22 identification could be smaller in “real-world” contexts than that identified in the RAPIDO trial.  
23  
24 Longer term reductions in capital, labour and consumable inputs could not be measured within  
25  
26 the period of trial-follow-up and are not reflected in the economic evaluation. For example, the  
27  
28 MALDI-TOF process requires less physical space in the laboratory compared to conventional  
29  
30 approaches, and a substantial long-term switch to the new technology would reduce the capital  
31  
32 costs of microbiology laboratories, as would reductions in the cost of MALDI-TOF machines that  
33  
34 may come from wider use and greater market competition. Changes in workflow using MALDI-  
35  
36 TOF reduce the time required from laboratory staff to complete an identification, meaning that  
37  
38 results can be supplied more quickly to clinical staff on wards significantly faster to clinical staff  
39  
40 on wards (a median of 35.6 hours after taking the blood sample using MALDI-TOF compared to  
41  
42 54.5 hours using conventional methods in the RAPIDO trial,  $p < 0.0001$ ).  
43  
44  
45

46  
47 Against this, it is important to note that ward costs accounted for 97% of all secondary care  
48  
49 costs, and the absence of a significant effect of MALDI-TOF diagnosis in reducing the length of  
50  
51 stay and improving survival is a central conclusion of the trial – and one that merits analysis in  
52  
53 future research (discussed below). Without evidence for improvements in these outcomes,  
54  
55 reductions in the costs of MALDI-TOF diagnosis are plausible but may not materially alter the  
56  
57 conclusions of our analysis.  
58  
59  
60

## Strengths and limitations

### Strengths

To our knowledge, this is the first economic evaluation conducted alongside a randomised clinical trial evaluating MALDI-TOF for rapid identification as an addition to conventional microbiological and biochemical methods in bloodstream infection. There has been much observational evidence on the effects of MALDI-TOF technology on non-health outcomes such as time to identification, but there is a lack of trial-based evidence on the costs and cost-effectiveness of using MALDI-TOF in clinical contexts.<sup>19</sup>

The cost-effectiveness analysis was conducted on a large dataset offering individual-level cost data on thousands of patients. The costing of the intervention itself was supported by a time and motion observational study conducted at one of the trial sites, while ward and antimicrobial data were valued using nationally representative data sources.

### Limitations

Mortality data was censored at 28 days, and information on ward type (by far the biggest cost driver) at seven days. We lacked the information necessary to examine longer-term costs and outcomes, albeit there is little reason to suspect that survival curves would diverge after 28 days to alter the primary survival outcome of the trial.

The cost analysis depended on a matching of the ward descriptions reported in the trial dataset to 'Service Descriptions' in NHS Reference Costs. This matching process was performed 'blind' to allocation, but the analysis of 28-day costs required an extrapolation from seven days to the earliest of death, discharge or the 28-day end-point. Unobserved changes in ward type after day 7 could change the estimated costs used in the base case, although no substantial difference was observed when comparing 28-day and 7-day analyses.

We did not have access to primary care records so our analysis was limited to a secondary care NHS perspective i.e. hospital resource use. In practice, because of the magnitude of per-day ward costs, it is unlikely that accounting for other health system costs would have a material impact on our findings, given that the mortality outcome favoured conventional diagnosis.

1  
2 Patients who were unable to consent for themselves and for whom no consultee was available  
3  
4 comprised 19.5% (n=1,082) of the 5,550 patients in the analysis population, and no data beyond  
5  
6 the mortality outcome, allocation, age and sex was available for them. However, apart from this  
7  
8 group of patients, and the absence of ward-specific data between days 8 and 28, the amount of  
9  
10 missing data in key cost drivers was limited.

11  
12  
13 The multiple imputation model estimated that these 1,082 patients had lower mean costs than  
14  
15 the other 4,468 participants. Is this plausible? On the one hand, costs should be expected to  
16  
17 diverge between the two groups given that the 1,082 patients who did not provide consent are all  
18  
19 known to have survived for at least 28 days. Thus, the lower costs generated by the imputation  
20  
21 model may reflect a population less acutely ill than the other participants. On the other hand,  
22  
23 prolonged survival without discharge would give rise to higher costs than early death during the  
24  
25 trial period.  
26  
27

28  
29 These considerations complicate assessments of direction of the biases in the available case  
30  
31 data. However, the conclusions that emerge from the multiple imputation results, the available  
32  
33 case results, and the various sensitivity analyses are similar in identifying considerable  
34  
35 uncertainty around the cost-effectiveness of MALDI-TOF in this patient group.  
36  
37

38  
39 Finally, the economic evaluation was limited to identifying the cost-effectiveness of the  
40  
41 intervention and did not identify the mechanisms that gave rise to the survival outcomes in the  
42  
43 trial. Evidence from the analysis of secondary clinical outcomes in the RAPIDO trial indicates  
44  
45 that time to provision of microbiological identification to the ward was significantly shorter in the  
46  
47 RAPIDO arm and there was weak evidence of longer time to initiation of appropriate  
48  
49 antimicrobial therapy in the RAPIDO arm (median 24.0 versus 13.0 hours, p=0.056). However,  
50  
51 there was no significant difference between arms in other secondary outcomes: time to providing  
52  
53 Gram stain and antimicrobial susceptibility results to the ward; time to resolution of fever (up to  
54  
55 seven days) or discharge (up to 28 days); *C. difficile* incidence (to 28 days); in-hospital  
56  
57 antimicrobial consumption (to seven days) or the proportion of patients remaining on broad-  
58  
59 spectrum therapy at seven days <sup>2</sup>.  
60

## Future research

Future research could examine the mechanisms by which mortality outcomes may differ between MALDI-TOF and conventional diagnosis. Analysis of length of stay and survival in observational study designs in US contexts by Huang et al<sup>20</sup> and Perez et al<sup>21</sup> found beneficial effects of MALDI-TOF when used in conjunction with antimicrobial stewardship programmes, hinting at organisational changes that may be needed to exploit the faster identification offered by MALDI-TOF<sup>22</sup>. However, this is context-specific, as in other health systems, such as the NHS in which the present trial was conducted, bacteraemia consultation teams are routine and involved in care at an early stage.

## **Conclusion**

Overall, the evidence from the RAPIDO trial suggests that the use of MALDI-TOF as an adjunct to conventional microbial identification is unlikely to offer value when its incremental costs are compared to 28-day incremental survival. It is plausible that the costs of MALDI-TOF in “real-world” routine use may well be lower than those measured during the RAPIDO trial, and savings can also be expected as it would displace much conventional testing.

**Author contributions:** PD and WH: conducted the economic analysis. PD wrote the first draft of this manuscript. PD, WH, KP, RR, MS, AMG: Reviewed, commented and edited the manuscript. AMG: Chief investigator for the RAPIDO trial.

**Data statement:** Permission to share individual-level data was not obtained from trial participants. Requests for summary level data should be directed to AMG.



## References

1. Goto M, Al-Hasan MN. Overall burden of bloodstream infection and nosocomial bloodstream infection in North America and Europe. *Clin Microbiol Infect* 2013;19(6):501-09. doi: 10.1111/1469-0691.12195
2. MacGowan A, Grier S, Stoddart M, et al. Impact of rapid microbial identification on clinical outcomes in bloodstream infection: the RAPIDO randomised trial. *Clin Microbiol Infect* 2020 doi: <https://doi.org/10.1016/j.cmi.2020.01.030>
3. Timbrook TT, Morton JB, McConeghy KW, et al. The Effect of Molecular Rapid Diagnostic Testing on Clinical Outcomes in Bloodstream Infections: A Systematic Review and Meta-analysis. *Clinical infectious diseases : an official publication of the Infectious Diseases Society of America* 2017;64(1):15-23. doi: 10.1093/cid/ciw649 [published Online First: 2016/11/03]
4. Albur MS, Bowker K, Weir I, et al. Factors influencing the clinical outcome of methicillin-resistant *Staphylococcus aureus* bacteraemia. *European journal of clinical microbiology & infectious diseases : official publication of the European Society of Clinical Microbiology* 2012;31(3):295-301. doi: 10.1007/s10096-011-1310-2 [published Online First: 2011/06/15]
5. Laupland KB, Gregson DB, Church DL, et al. Incidence, risk factors and outcomes of *Escherichia coli* bloodstream infections in a large Canadian region. *Clinical microbiology and infection : the official publication of the European Society of Clinical Microbiology and Infectious Diseases* 2008;14(11):1041-7. doi: 10.1111/j.1469-0691.2008.02089.x [published Online First: 2008/12/02]
6. van Hal SJ, Jensen SO, Vaska VL, et al. Predictors of mortality in *Staphylococcus aureus* Bacteremia. *Clinical microbiology reviews* 2012;25(2):362-86. doi: 10.1128/cmr.05022-11 [published Online First: 2012/04/12]
7. Seifert H. The Clinical Importance of Microbiological Findings in the Diagnosis and Management of Bloodstream Infections. *Clin Infect Dis* 2009;48(Supplement 4):S238-S45. doi: <http://dx.doi.org/10.1086/598188>
8. Evans RN, Pike K, Rogers CA, et al. Modifiable healthcare factors affecting 28-day survival in bloodstream infection: a prospective cohort study. *BMC Infect Dis* 2020;20(1):545. doi: 10.1186/s12879-020-05262-6
9. Fournier P-E, Drancourt M, Colson P, et al. Modern clinical microbiology: new challenges and solutions. *Nature Reviews Microbiology* 2013;11(8):574-85. doi: <http://dx.doi.org/10.1038/nrmicro3068>
10. Curtis L, Burns A. Unit Costs of Health and Social Care 2019. Personal Social Services Research Unit. University of Kent, Canterbury, 2018.
11. Department of Health. Reference Costs 2012/13. London, 2013.
12. Joint Formulary Committee. British National Formulary (BNF): Pharmaceutical Press, 2012.
13. White IR, Royston P, Wood AM. Multiple imputation using chained equations: Issues and guidance for practice. *Stat Med* 2011;30(4):377-99. doi: 10.1002/sim.4067
14. Royston P, White IR. Multiple Imputation by Chained Equations (MICE): Implementation in Stata. *Journal of Statistical Software* 2011;45:1-20.
15. Faria R, Gomes M, Epstein D, et al. A Guide to Handling Missing Data in Cost-Effectiveness Analysis Conducted Within Randomised Controlled Trials. *Pharmacoeconomics* 2014;32(12):1157-70. doi: 10.1007/s40273-014-0193-3
16. Willan AR, Briggs AH, Hoch JS. Regression methods for covariate adjustment and subgroup analysis for non-censored cost-effectiveness data. *Health Econ* 2004;13(5):461-75. doi: 10.1002/hec.843

- 1  
2  
3 17. Bearman GML, Wenzel RP. Bacteremias: A Leading Cause of Death. *Arch Med Res*  
4 2005;36(6):646-59. doi: <http://dx.doi.org/10.1016/j.arcmed.2005.02.005>  
5  
6 18. Kilgore M, Brossette S. Cost of bloodstream infections. *Am J Infect Control* 2008;36(10):S172.e1-  
7 S72.e3.  
8 19. Dixon P, Davies P, Hollingworth W, et al. A systematic review of matrix-assisted laser  
9 desorption/ionisation time-of-flight mass spectrometry compared to routine microbiological  
10 methods for the time taken to identify microbial organisms from positive blood cultures. *Eur*  
11 *J Clin Microbiol Infect Dis* 2015;34(5):863-76. doi: 10.1007/s10096-015-2322-0  
12 20. Huang AM, Newton D, Kunapuli A, et al. Impact of Rapid Organism Identification via Matrix-  
13 Assisted Laser Desorption/Ionization Time-of-Flight Combined With Antimicrobial  
14 Stewardship Team Intervention in Adult Patients With Bacteremia and Candidemia. *Clin*  
15 *Infect Dis* 2013;57(9):1237-45. doi: <http://dx.doi.org/10.1093/cid/cit498>  
16 21. Perez KK, Olsen RJ, Musick WL, et al. Integrating Rapid Pathogen Identification and Antimicrobial  
17 Stewardship Significantly Decreases Hospital Costs. *Arch Pathol Lab Med* 2012;137(9):1247-  
18 54. doi: <http://dx.doi.org/10.5858/arpa.2012-0651-OA>  
19 22. Kothari A, Morgan M, Haake D. Emerging Technologies for Rapid Identification of Bloodstream  
20 Pathogens. *Clin Infect Dis* 2014  
21  
22  
23  
24  
25  
26  
27  
28  
29  
30  
31  
32  
33  
34  
35  
36  
37  
38  
39  
40  
41  
42  
43  
44  
45  
46  
47  
48  
49  
50  
51  
52  
53  
54  
55  
56  
57  
58  
59  
60

1  
2  
3  
4  
5  
6  
7  
8  
9  
10  
11  
12  
13  
14  
15  
16  
17  
18  
19  
20  
21  
22  
23  
24  
25  
26  
27  
28  
29  
30  
31  
32  
33  
34  
35  
36  
37  
38  
39  
40  
41  
42  
43  
44  
45  
46  
47  
48  
49  
50  
51  
52  
53  
54  
55  
56  
57  
58  
59  
60

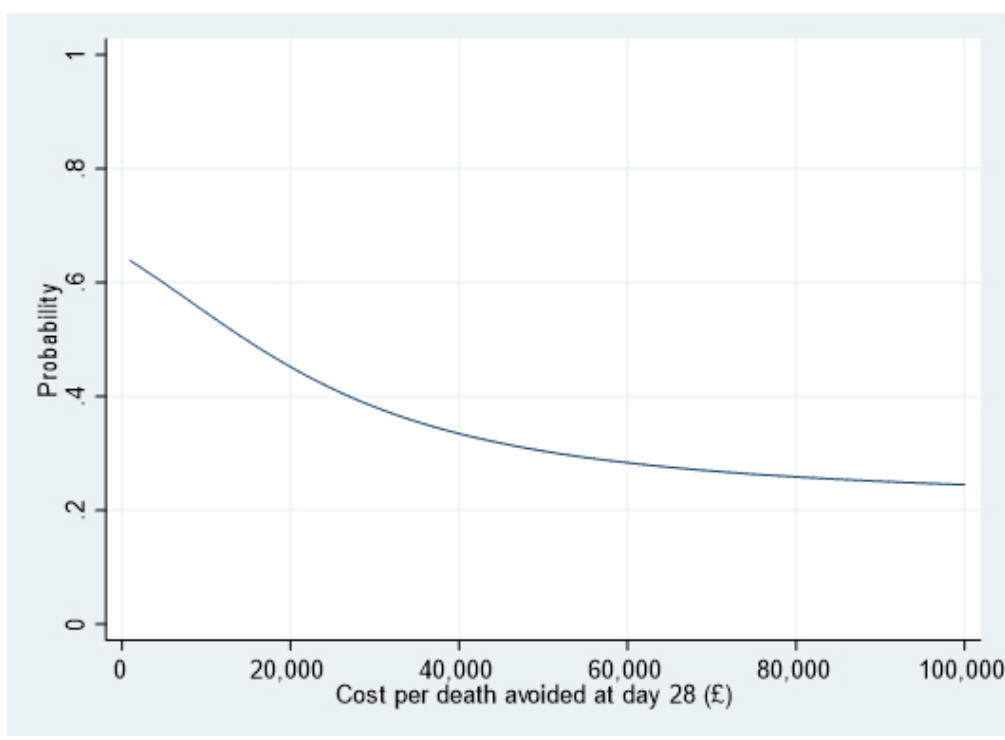

Cost-effectiveness acceptability curve for base case

## SUPPLEMENTARY MATERIAL - Cost-effectiveness of rapid laboratory-based mass-spectrometry diagnosis of bloodstream infection: Evidence from the RAPIDO randomized controlled trial

### Costing of hospital stays

The cost of ward stays was calculated from the 2012/13 NHS Reference Costs (1) and then inflated using Curtis and Burns (2) as described in main text.

### Costing by ward speciality

Hospital admission was an inclusion criterion for the RAPIDO trial, but a small number of “non-admitted” ward-days could occur in cases where the diagnostic blood sample was taken in an outpatient or day-case setting shortly before admission to a more appropriate speciality. Therefore, all ward stays were costed as inpatients unless the ward speciality recorded in the dataset explicitly specified otherwise e.g. day-case surgery.

The ward specialities described in the dataset were mapped to their nearest equivalent Service Descriptions and currency codes in NHS Reference Costs as shown in *Table* . Where more than one Service Description or currency code applied to a ward speciality, the ward cost was calculated as an average of the unit costs of each Service Description or currency code, weighted by the number of bed-days reported for them in NHS Reference Costs. An example calculation is shown in **Error! Reference source not found..**

The RAPIDO dataset did not include the number of organs supported in critical care so the cost of stays in high-dependency units (HDUs) and intensive therapy units (ITUs) was also calculated as a weighted average. The costs of a bed-day on an adult critical care unit for the different levels of organ support are listed in NHS Reference Costs; these costs were weighted by the number of bed-days reported for patients at each level of support to give an average cost for use in analysis.

Table A1 Matching of RAPIDO ward specialities to NHS Reference Cost categories

| RAPIDO ward speciality description                                                | NHS Reference Cost 'Service Description'       | NHS Reference Cost 'service code' or 'currency description' <sup>a,b</sup> |
|-----------------------------------------------------------------------------------|------------------------------------------------|----------------------------------------------------------------------------|
| Medical: Acute medical admissions and pre-admissions                              | Accident and Emergency                         | Admitted codes only <sup>c</sup>                                           |
| Medical: Cardiology / cardiovascular / coronary                                   | Cardiology                                     | 320                                                                        |
| Medical: Care of the Elderly                                                      | Geriatric Medicine                             | 430                                                                        |
| Medical: Dermatology / rheumatology                                               | Dermatology AND<br>Rheumatology                | 410[R] AND 330[D]                                                          |
| Medical: Diabetes / endocrinology                                                 | Diabetic Medicine AND<br>Endocrinology         | 307[D] AND 302[E]                                                          |
| Medical: Gastroenterology / gastrology / liver                                    | Gastroenterology AND<br>Hepatology             | 301 [G] and 306[H]                                                         |
| Medical: General medical (no declared speciality)                                 | General Medicine                               | 300                                                                        |
| Medical: Haematology / oncology                                                   | Clinical haematology AND<br>Clinical oncology  | 303[H] and 800[O]                                                          |
| Medical: Infectious disease / travel medicine                                     | Infectious Diseases                            | 350                                                                        |
| Medical: Nephrology / renal / dialysis                                            | Nephrology                                     | 361                                                                        |
| Medical: Neurology / neurosciences / neuromedical                                 | Neurology                                      | 400                                                                        |
| Medical: Palliative                                                               | Palliative Medicine                            | 315                                                                        |
| Medical: Respiratory                                                              | Respiratory Medicine                           | 328                                                                        |
| Medical: Stroke                                                                   | Stroke Medicine                                | 340                                                                        |
| ITU/HDU <sup>d</sup> : General (not specified as surgical, medical or specialist) | Adult Critical Care Unit                       | Critical care currencies                                                   |
| ITU/HDU: General medical                                                          | N/A <sup>e</sup>                               | N/A                                                                        |
| ITU/HDU: General surgical                                                         | Adult Critical Care Unit                       | Critical care currencies                                                   |
| ITU/HDU: Cardiac                                                                  | Adult Critical Care Unit                       | Critical care currencies                                                   |
| ITU/HDU: Neurology/neurosurgery                                                   | Adult Critical Care Unit                       | Critical care currencies                                                   |
| ITU/HDU: Renal                                                                    | N/A                                            | N/A                                                                        |
| ITU/HDU: Theatre recovery areas                                                   | N/A                                            | N/A                                                                        |
| Surgery: Admissions / pre-admissions units                                        | General surgery                                | 100                                                                        |
| Surgery: Cardiothoracic / thoracic                                                | Cardiothoracic surgery AND<br>Thoracic surgery | 170[C] and 173[T]                                                          |
| Surgery: Ear, nose, throat, oral & maxillo-facial, and ophthalmic units           | All surgical codes <sup>f</sup>                | Inpatient codes only <sup>c</sup>                                          |
| Surgery: General including GI, breast, vascular                                   | General surgery                                | 100                                                                        |

|                                                                              |                                            |                                   |
|------------------------------------------------------------------------------|--------------------------------------------|-----------------------------------|
| Surgery: Neurosurgery                                                        | Neurosurgery                               | 150                               |
| Surgery: Orthopaedic / trauma                                                | Trauma & Orthopaedics                      | 110                               |
| Surgery: Plastics / burns                                                    | Plastic surgery                            | 160                               |
| Surgery: Short stay and daycase units                                        | General surgery                            | 100, day cases only               |
| Surgery: Urology / renal                                                     | All surgical codes <sup>f</sup>            | Inpatient codes only <sup>c</sup> |
| Other: A&E, emergency assessment, fracture clinics and related units         | Accident and Emergency                     | Admitted codes only <sup>c</sup>  |
| Other: Imaging, diagnostics and telemetry                                    | N/A                                        | N/A                               |
| Other: Obstetrics & gynaecology                                              | Obstetrics                                 | 501                               |
| Other: Psychology / psychiatry / mental health                               | N/A                                        | N/A                               |
| Other: Services - not medical, surgical or HDU/ITU, and not listed elsewhere | "Other Procedures or Health Care Problems" | Inpatient codes only <sup>c</sup> |

<sup>a</sup> If there were separate codes for adults and children, only adult codes were used.

<sup>b</sup> If multiple NHS Service Descriptions or Currency Codes applied, costs were weighted by the number of bed-days occupancy for each Description or Code (or, in critical care, number of organs supported) reported in NHS Reference Costs.

<sup>c</sup> Only 'Inpatient' or 'Admitted' codes were used in these cases as all RAPIDO patients were admitted before or soon after taking of the diagnostic blood sample.

<sup>d</sup> HDU/ITU = critical care specialities (high dependency and intensive therapy units), costs weighted by number of bed-days occupancy for each number of organs supported in critical care.

<sup>e</sup> N/A = Not applicable – not costed as no observations in the trial.

<sup>f</sup> A weighted average across all admitted surgical codes was used for surgical specialities that were not listed specifically in NHS Reference Costs. Costing by length of stay

Hospitals in the NHS are paid according to patients' length of stay, with different levels of payment being made according to whether each bed-day of the stay is an 'inlier' bed-day or an excess (or 'outlier') bed-day. These payments constitute 'costs' from an NHS system perspective and we used them to cost hospital stays.

The total costs of the patients' stays in each arm of the trial depend on their whole ward history from the date of admission, not from the date of randomisation - although, clearly, differences due to the RAPIDO intervention could only accrue after randomisation. The total hospital cost could not be calculated because, although the date of admission was known, it was not known for how long patients had been on particular wards before the diagnostic blood samples were taken.

The distinction between an inlier bed-day and an excess bed-day is defined by reference to a trim point, a figure which is intended to capture the upper end of the range of lengths of stay expected for a given currency code. It is calculated as the (upper quartile of length of stay) + 1.5 × (interquartile range of length of stay). In a long stay, days after the trim point are counted as excess bed-days, while days up to the trim point are counted as inliers.

For inlier costs, national average unit costs and average length of stay (number of days) per Finished Consultant Episode are reported. A Finished Consultant Episode is a completed episode of treatment

received by a patient under the care of one consultant. Dividing the mean nationwide unit cost for a given currency code by the mean nationwide number of inpatient days for a patient admitted under that currency code gives its estimated per-day cost. To obtain the weighted cost for each currency code, we multiply the per-day cost by the share of that currency code in the total bed-days of all currency codes in each Service Description. The sum of these figures is the weighted average per-day cost for either elective inpatient or non-elective inpatients receiving treatment under that Service Description. Unit costs per excess bed day are calculated in a similar manner.

### Elective and non-elective stays

The RAPIDO dataset did not include information to classify each day of each patient's stay in a ward as elective or non-elective. It is likely that a high proportion of ward admittances after day 0 of the trial were non-elective since they followed a presumed diagnosis (or, at least, clear suspicion) of bloodstream infection, as evidenced by the taking of a blood sample for culture. However, it is possible that the infection developed during an elective admission, so ward costs – particularly on day 0 – might in fact be charged as elective. We therefore included both elective and non-elective costs in our calculations, by weighting the average cost of all currency codes in each category (elective and non-elective) by their respective shares in bed-days.

A post hoc analysis examined the sensitivity of unit costs to the exclusion of elective care. The effect on unit costs of this exclusion was modest. In some cases, unit costs do not distinguish between elective and non-elective (e.g. for critical care) and the exclusion had no effect, and in other cases the effect of excluding elective admissions was to reduce unit costs by approximately 0.1% to 1%. We consider that including elective care in the calculation of unit costs in general is a conservative approach, and one appropriate to our base-case analysis. We therefore did not re-run this analysis using the very slightly lower unit costs that would have arisen under the exclusion of elective care.

### Example: calculation of per-day cost for a 'General Medical' ward stay

The steps involved in the calculation of unit costs for the 'General Medicine' Service Description are set out in Table A2.

Table A2 Example calculation of weighted per-day cost associated with the 'General Medicine' Service Description in 2012/13

| Item                                                                              | Quantity or share of total | Calculation |
|-----------------------------------------------------------------------------------|----------------------------|-------------|
| <i>Number of bed-days<sup>a</sup></i>                                             |                            |             |
| National total bed-days per year:<br>Elective Inpatient excluding short-stay (EI) | 96,339                     | A           |
| National total bed-days per year:<br>Non-Elective Inpatient (NEI)                 | 6,398,877                  | B           |
| National total bed-days per year:<br>Non-Elective Inpatient Short-stay (NEI-S)    | 1,545,596                  | C           |
| National total bed-days per year:<br>Inpatients (EI + NEI + NEI-S)                | 8,040,812                  | D=(A+B+C)   |
| <i>Share of bed-days</i>                                                          |                            |             |

|                                                                                                                 |         |                |
|-----------------------------------------------------------------------------------------------------------------|---------|----------------|
| % of days that relate to EI                                                                                     | 1.20%   | $E=A/D$        |
| % of days that relate to NEI                                                                                    | 79.58%  | $F=B/D$        |
| % of days that relate to NEI-S                                                                                  | 19.22%  | $G=C/D$        |
| <i>Averaging over inlier/outlier bed-days and currency codes</i>                                                |         |                |
| Weighted <sup>b</sup> average per-day cost: EI                                                                  | £456.18 | $H^b$          |
| Weighted <sup>b</sup> average per-day cost: NEI                                                                 | £327.48 | $I^b$          |
| Weighted <sup>b</sup> average per-day cost: NEI-S                                                               | £434.19 | $J^b$          |
| <i>Contributions of elective, non-elective and short stays</i>                                                  |         |                |
| Weighted <sup>c</sup> EI cost per day                                                                           | £5.47   | $K=H \times E$ |
| Weighted <sup>c</sup> NEI cost per day                                                                          | £260.61 | $L=F \times I$ |
| Weighted <sup>c</sup> NEI-S cost per                                                                            | £83.46  | $M=G \times J$ |
| <i>Estimated mean cost per day for RAPIDO analysis</i>                                                          |         |                |
| Cost of a General Medical ward-day for RAPIDO analysis i.e. weighted average of EI, NEI and NEI-S per day costs | £349.53 | $K+L+M$        |

<sup>a</sup>'Bed-days' here captures both bed days and excess bed days. <sup>b</sup>These figures are calculated as the average of bed-day-weighted sum of costs for inlier bed-days and excess bed-days across all currency codes within the 'General Medicine' service description, weighted by proportion of bed-days from each currency code, as described in the text. <sup>c</sup>These figures are weighted by the proportion of bed-days from each type of inpatient stay (elective, non-elective, and non-elective short-stay).

## Costing of MALDI-TOF spectrometry

Data from published literature and confidential information provided by one study centre was used to estimate a mean per blood-sample cost of diagnosis using MALDI-TOF technology at 2012/13 prices and then subsequently inflated.

At this centre, 4,303 machine-positive adult blood samples were recorded during the whole study period, equating to 2,061 per year. In routine use of the technology, all of these would have been tested by MALDI-TOF but fewer were actually tested during the RAPIDO trial. Only 3,153 flagged positive during study hours (=1510/year) and, with 1:1 randomisation, only approximately half of those (755) would have been allocated to MALDI-TOF diagnosis.

We estimated the proportion of total MALDI-TOF cost attributable to use for positive blood cultures as 12% based on two considerations. First, approximately 10-15% of all microbiology laboratory requests for 'culture and sensitivity' related to blood samples. Second, at this centre, organisms from blood accounted for approximately 12% of all organisms identified.

We used these figures to calculate the capital, operating, labour and consumable costs used per positive sample as set out in Table A3. Salary costs and information concerning on costs and overheads were taken from Curtis (2013).(3)



Table A3 Calculation of unit cost of MALDI-TOF identification in 2012/13 prices

| Item                                                                 | Mean value   | Comment / data source                                                                                                  |
|----------------------------------------------------------------------|--------------|------------------------------------------------------------------------------------------------------------------------|
| <i>Capital-related costs</i>                                         |              |                                                                                                                        |
| Capital cost for new MALDI-TOF machine                               | £130,000     | Published literature, catalogue prices, confidential information from one study centre                                 |
| Economic life used for depreciation calculations                     | 10 years     | Published literature, catalogue prices, confidential information from one study centre                                 |
| Annual capital charge per blood sample                               | £0.76        |                                                                                                                        |
| <i>Maintenance costs</i>                                             |              |                                                                                                                        |
| Annual non-reagent maintenance contract (13% of capital cost)        | £16,900      | Published literature, confidential information from one study centre                                                   |
| Maintenance cost per blood sample                                    | £0.98        |                                                                                                                        |
| <i>Consumable costs</i>                                              |              |                                                                                                                        |
| Consumables cost per blood sample, as used in RAPIDO protocol        | £0.17        | Trial protocol, catalogue data, information from one study centre                                                      |
| <i>Labour costs, including on-costs and overheads</i>                |              |                                                                                                                        |
| Band 5 salary                                                        | £62,927      | Staff grades at one study centre, published NHS paycales, Curtis (2013) for information on oncosts and overhead        |
| Band 6 salary                                                        | £76,569      | Staff grades at one study centre; published NHS paycales; information on on-costs and overheads from Curtis (2013).(3) |
| Labour cost per sample                                               | £4.17        | ...assuming that each grade contributes equally to processing of all blood samples                                     |
| <i>Total cost</i>                                                    |              |                                                                                                                        |
| Total cost per machine-positive blood sample analysed with MALDI-TOF | <u>£6.08</u> |                                                                                                                        |

## Costs and results in 2012/13 price levels

Table A4 Costs in available cases

| Mean cost           | Control<br>(N=2,271) | RAPIDO<br>(N=2,197) | Difference (95% CI) <sup>a</sup> |
|---------------------|----------------------|---------------------|----------------------------------|
| Intervention cost   | -                    | £6                  | +£6                              |
| Antimicrobial cost  | £247                 | £265                | +£18 (-£6 to £41)                |
| 7-day ward costs    | £3,448               | £3,404              | -£44 (-£165 to £77)              |
| Total 7-day costs   | £3,695               | £3,675              | -£20 (-£148 to £108)             |
| 28-day ward costs   | £8,451               | £8,412              | -£39 (-£505 to £427)             |
| Total 28-days costs | £8,698               | £8,682              | -£15 (-£487 to £456)             |

<sup>a</sup> Confidence intervals around mean differences calculated from unadjusted linear regression

## Cost-effectiveness and sensitivity analysis

! "# \$ % & ' ( ) \* + , - . / : ; < = > ? @ A B C D E F G H I J K L M N O P Q R S T U V W X Y Z

Table A5 Costs and outcome: base-case analysis with imputation (N=5,550)

|                              | Control | RAPIDO | Difference (95% CI)      |
|------------------------------|---------|--------|--------------------------|
| Mean 28-day NHS costs        | £ 7,485 | £7,371 | -£114 (-£710 to £482)    |
| 28-day survival <sup>a</sup> | 0.823   | 0.814  | -0.009 (-0.029 to 0.011) |

<sup>a</sup>Survival measured as the proportion of patients alive at day 28.

Table A6 Cost-effectiveness: base-case analysis with imputation (N=5,550)

| Threshold <sup>a</sup> | Net monetary benefit (95% CI) | Probability of cost-effectiveness |
|------------------------|-------------------------------|-----------------------------------|
| £5,000                 | £71 (-£519 to £661)           | 0.59                              |
| £10,000                | £28 (-£579 to £636)           | 0.54                              |
| £20,000                | -£57 (-£745 to £630)          | 0.44                              |
| £30,000                | -£143 (-£954 to £668)         | 0.36                              |
| £50,000                | -£315 (-£1,443 to £814)       | 0.29                              |

<sup>a</sup>Threshold value = 28-day cost per death avoided at 28 days.

/ , 1 , 1  
\* ) 4 1 -

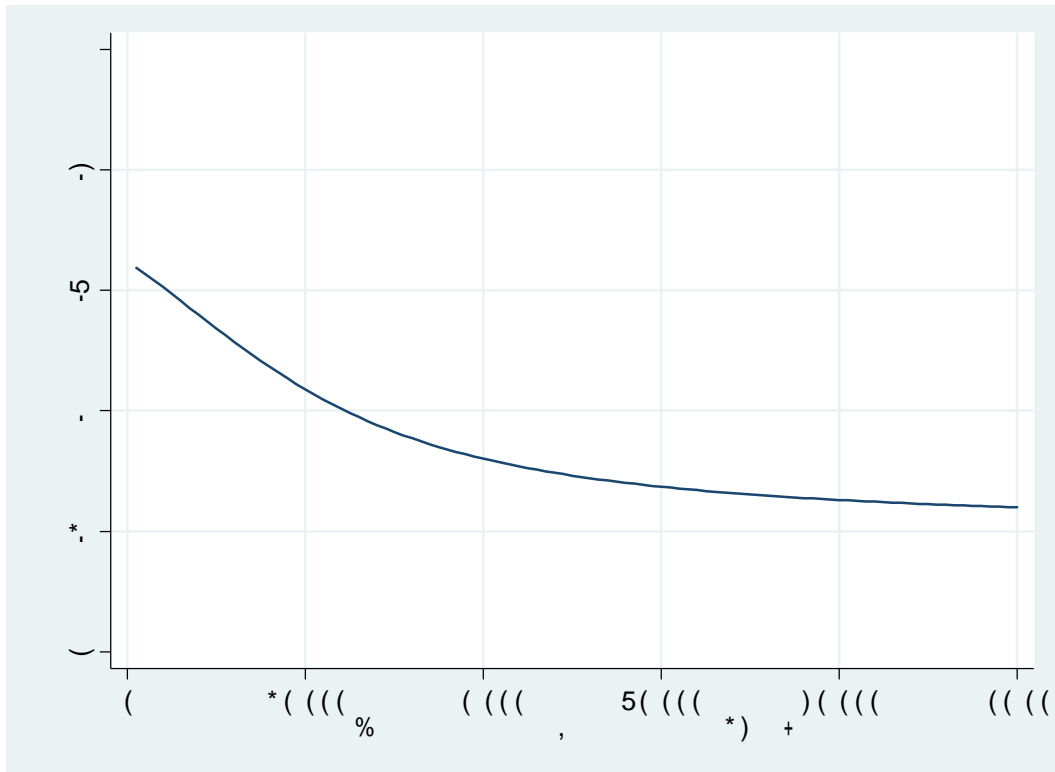

Figure A1 Cost-effectiveness acceptability curve for base case

6 "#\$ , +  
- 7 1 , \*

Subgroup analysis

1 1 1 - 8  
1 1 9 : (-. \* , 1  
1 9 : (-55+ % ,  
1 1 1 -

Table A7 Sensitivity analysis: costs and outcome

|                                  |            | Excluding unapproached survivors,<br>N=4,468, cost at 28 days |                    | Excluding unapproached survivors,<br>N=4,468, cost at 7 days |                    | Including unapproached survivors,<br>N=5,550, cost at 7 days |                    |
|----------------------------------|------------|---------------------------------------------------------------|--------------------|--------------------------------------------------------------|--------------------|--------------------------------------------------------------|--------------------|
| NHS costs<br>mean (95% CI)       | Control    | £8,705                                                        | (£8,376 to £9,033) | £3,697                                                       | (£3,608 to £3,786) | £3,324                                                       | (£3,098 to £3,598) |
|                                  | RAPIDO     | £8,675                                                        | (£8,341 to £9,009) | £3,673                                                       | (£3,583 to £3,763) | £3,238                                                       | (£3,094 to £3,619) |
|                                  | Difference | -£30                                                          | (-£498 to £439)    | -£24                                                         | (-£151 to £103)    | -£86                                                         | (-£324 to £153)    |
| 28-day survival<br>mean (95% CI) | Control    | 0.78                                                          | (0.76 to 0.80)     | 0.78                                                         | (0.76 to 0.80)     | 0.82                                                         | (0.81 to 0.84)     |
|                                  | RAPIDO     | 0.77                                                          | (0.75 to 0.79)     | 0.77                                                         | (0.75 to 0.79)     | 0.81                                                         | (.80 to 0.83)      |
|                                  | Difference | -0.01                                                         | (-0.04 to 0.01)    | -0.01                                                        | (-0.04 to -0.01)   | -0.01                                                        | (-0.03 to 0.01)    |

Table A8 Sensitivity analysis: cost effectiveness

| Threshold <sup>a</sup> | Excluding unapproached survivors, N=4,468, cost<br>at 28 days |                   |                  | Excluding unapproached survivors,<br>N=4,468, cost at 7 days |                   |      | Including unapproached survivors, N=5,550, cost at<br>7 days |                   |      |
|------------------------|---------------------------------------------------------------|-------------------|------------------|--------------------------------------------------------------|-------------------|------|--------------------------------------------------------------|-------------------|------|
|                        | NMB                                                           | (95% CI)          | PCE <sup>b</sup> | NMB                                                          | (95% CI)          | PCE  | NMB                                                          | (95% CI)          | PCE  |
| £50,000                | -£32                                                          | (-£489 to £425)   | 0.45             | -£38                                                         | (-£199 to £124)   | 0.32 | £43                                                          | (-£209 to £295)   | 0.63 |
| £10,000                | -£94                                                          | (-£572 to £385)   | 0.35             | -£99                                                         | (-£356 to £158)   | 0.23 | £0                                                           | (-£305 to -£305)  | 0.50 |
| £20,000                | -£217                                                         | (-£814 to £381)   | 0.24             | -£222                                                        | (-£707 to £263)   | 0.18 | -£86                                                         | (-£548 to £377)   | 0.36 |
| £30,000                | -£340                                                         | (-£1,117 to £438) | 0.20             | -£345                                                        | (-£1,069 to £379) | 0.17 | -£171                                                        | (-£817 to £474)   | 0.30 |
| £50,000                | -£586                                                         | (-£1,793 to £622) | 0.17             | -£591                                                        | (-£1,799 to £616) | 0.17 | -£343                                                        | (-£1,376 to £691) | 0.26 |

<sup>a</sup>Threshold value = cost per death avoided at 28 days; <sup>b</sup>NMB = net monetary benefit [mean (95% confidence interval)]; <sup>c</sup>PCE = probability of cost-effectiveness at given threshold.

Table A9 Subgroup analysis: costs and outcome

|                                   |            | All (unapproached survivors excluded)<br>N=4,468 |                    | Clinically significant episodes only<br>N=3,010 (67%) |                    | Clinically non-significant episodes only<br>N=1,458 (33%) |                    |
|-----------------------------------|------------|--------------------------------------------------|--------------------|-------------------------------------------------------|--------------------|-----------------------------------------------------------|--------------------|
| 28-day NHS costs<br>mean (95% CI) | Control    | £8,705                                           | (£8,376 to £9,033) | £8,570                                                | (£8,148 to £8,992) | £8,565                                                    | (£7,962 to £9,168) |
|                                   | RAPIDO     | £8,675                                           | (£8,341 to £9,009) | £8,716                                                | (£8,278 to £9,155) | £8,199                                                    | (£7,611 to £8,787) |
|                                   | Difference | -£30                                             | (-£498 to £439)    | £146                                                  | (-£425 to £717)    | -£365                                                     | (-£1,186 to £454)  |
| 28-day survival<br>mean (95% CI)  | Control    | 0.78                                             | (0.76 to 0.80)     | 0.78                                                  | (0.76 to 0.79)     | 0.80                                                      | (0.77 to 0.83)     |
|                                   | RAPIDO     | 0.77                                             | (0.75 to 0.79)     | 0.77                                                  | (0.75 to 0.79)     | 0.78                                                      | (0.75 to 0.81)     |
|                                   | Difference | -0.01                                            | (-0.04 to 0.01)    | -0.01                                                 | (-0.04 to 0.02)    | -0.02                                                     | (-0.06 to 0.02)    |

Table A10 Subgroup analysis: cost effectiveness at 28 days

| Threshold<br>value <sup>a</sup> | All (unapproached survivors excluded) N=4,468 |                   |                  | Clinically significant episodes only N=3,010 (67%) |                     |      | Clinically non-significant episodes only N=1,458<br>(33%) |                     |      |
|---------------------------------|-----------------------------------------------|-------------------|------------------|----------------------------------------------------|---------------------|------|-----------------------------------------------------------|---------------------|------|
|                                 | NMB <sup>b</sup>                              | (95% CI)          | PCE <sup>c</sup> | NMB                                                | (95% CI)            | PCE  | NMB                                                       | (95% CI)            | PCE  |
| £50,000                         | -£32                                          | (-£489 to £425)   | 0.45             | -£191                                              | (-£780 to £390)     | 0.26 | £263                                                      | (-£585 to £1,110)   | 0.73 |
| £10,000                         | -£94                                          | (-£572 to £385)   | 0.35             | -£235                                              | (-£879 to £409)     | 0.24 | £160                                                      | (£765 to £1,085)    | 0.63 |
| £20,000                         | -£217                                         | (-£814 to £381)   | 0.24             | -£324                                              | (-£1,149 to £501)   | 0.22 | -£47                                                      | (-£1,231 to £1,138) | 0.47 |
| £30,000                         | -£340                                         | (-£1,117 to £438) | 0.20             | -£413                                              | (-£1,472 to £647)   | 0.22 | -£253                                                     | (-£276 to -£230)    | 0.37 |
| £50,000                         | -£586                                         | (-£1,793 to £622) | 0.17             | -£591                                              | (-£2,814 to £1,003) | 0.23 | -£665                                                     | (-£700 to -£631)    | 0.28 |

<sup>a</sup>Threshold value = cost per death avoided at 28 days; <sup>b</sup>NMB = net monetary benefit [mean (95% confidence interval)]; <sup>c</sup>PCE = probability of cost-effectiveness at given threshold.

## References

1. **Department of Health** (2013) Reference Costs 2012/13. London.
2. **Curtis L & Burns A** (2018) Unit Costs of Health and Social Care 2019. Personal Social Services Research Unit. University of Kent, Canterbury.
3. **Curtis L** (2013) *Unit Costs of Health and Social Care 2013*. Canterbury: Personal Social Services Research Unit.

For peer review only

## CHEERS checklist—Items to include when reporting economic evaluations of health interventions

| Section/item                    | Item No | Recommendation                                                                                                                                                                          | Reported on page No/<br>line No |
|---------------------------------|---------|-----------------------------------------------------------------------------------------------------------------------------------------------------------------------------------------|---------------------------------|
| <b>Title and abstract</b>       |         |                                                                                                                                                                                         |                                 |
| Title                           | 1       | Identify the study as an economic evaluation or use more specific terms such as “cost-effectiveness analysis”, and describe the interventions compared.                                 | P1                              |
| Abstract                        | 2       | Provide a structured summary of objectives, perspective, setting, methods (including study design and inputs), results (including base case and uncertainty analyses), and conclusions. | P1                              |
| <b>Introduction</b>             |         |                                                                                                                                                                                         |                                 |
| Background and objectives       | 3       | Provide an explicit statement of the broader context for the study.                                                                                                                     | P5-6                            |
|                                 |         | Present the study question and its relevance for health policy or practice decisions.                                                                                                   | P5-6                            |
| <b>Methods</b>                  |         |                                                                                                                                                                                         |                                 |
| Target population and subgroups | 4       | Describe characteristics of the base case population and subgroups analysed, including why they were chosen.                                                                            | P5-6                            |
| Setting and location            | 5       | State relevant aspects of the system(s) in which the decision(s) need(s) to be made.                                                                                                    | P5-6                            |
| Study perspective               | 6       | Describe the perspective of the study and relate this to the costs being evaluated.                                                                                                     | P5                              |
| Comparators                     | 7       | Describe the interventions or strategies being compared and state why they were chosen.                                                                                                 | P5                              |
| Time horizon                    | 8       | State the time horizon(s) over which costs and consequences are being evaluated and say why appropriate.                                                                                | P7                              |
| Discount rate                   | 9       | Report the choice of discount rate(s) used for costs and outcomes and say why appropriate.                                                                                              | N/A                             |
| Choice of health outcomes       | 10      | Describe what outcomes were used as the measure(s) of benefit in the evaluation and their relevance for the type of analysis performed.                                                 | N/A                             |

| Section/item                                           | Item No | Recommendation                                                                                                                                                                                                                                                                                                              | Reported on page No/<br>line No |
|--------------------------------------------------------|---------|-----------------------------------------------------------------------------------------------------------------------------------------------------------------------------------------------------------------------------------------------------------------------------------------------------------------------------|---------------------------------|
| Measurement of effectiveness                           | 11a     | <i>Single study-based estimates:</i> Describe fully the design features of the single effectiveness study and why the single study was a sufficient source of clinical effectiveness data.                                                                                                                                  | P25-7                           |
|                                                        | 11b     | <i>Synthesis-based estimates:</i> Describe fully the methods used for identification of included studies and synthesis of clinical effectiveness data.                                                                                                                                                                      | N/A                             |
| Measurement and valuation of preference based outcomes | 12      | If applicable, describe the population and methods used to elicit preferences for outcomes.                                                                                                                                                                                                                                 | N/A                             |
| Estimating resources and costs                         | 13a     | <i>Single study-based economic evaluation:</i> Describe approaches used to estimate resource use associated with the alternative interventions. Describe primary or secondary research methods for valuing each resource item in terms of its unit cost. Describe any adjustments made to approximate to opportunity costs. | P7-9                            |
|                                                        | 13b     | <i>Model-based economic evaluation:</i> Describe approaches and data sources used to estimate resource use associated with model health states. Describe primary or secondary research methods for valuing each resource item in terms of its unit cost. Describe any adjustments made to approximate to opportunity costs. | N/A                             |
| Currency, price date, and conversion                   | 14      | Report the dates of the estimated resource quantities and unit costs. Describe methods for adjusting estimated unit costs to the year of reported costs if necessary. Describe methods for converting costs into a common currency base and the exchange rate.                                                              | P7-9                            |
| Choice of model                                        | 15      | Describe and give reasons for the specific type of decision-analytical model used. Providing a figure to show model structure is strongly recommended.                                                                                                                                                                      | N/A                             |



| Section/item                   | Item No | Recommendation                                                                                                                                                                                                                                                                                                                                        | Reported on page No/<br>line No |
|--------------------------------|---------|-------------------------------------------------------------------------------------------------------------------------------------------------------------------------------------------------------------------------------------------------------------------------------------------------------------------------------------------------------|---------------------------------|
| Assumptions                    | 16      | Describe all structural or other assumptions underpinning the decision-analytical model.                                                                                                                                                                                                                                                              | N/A                             |
| Analytical methods             | 17      | Describe all analytical methods supporting the evaluation. This could include methods for dealing with skewed, missing, or censored data; extrapolation methods; methods for pooling data; approaches to validate or make adjustments (such as half cycle corrections) to a model; and methods for handling population heterogeneity and uncertainty. | P9-11                           |
| <b>Results</b>                 |         |                                                                                                                                                                                                                                                                                                                                                       |                                 |
| Study parameters               | 18      | Report the values, ranges, references, and, if used, probability distributions for all parameters. Report reasons or sources for distributions used to represent uncertainty where appropriate. Providing a table to show the input values is strongly recommended.                                                                                   | P11-12                          |
| Incremental costs and outcomes | 19      | For each intervention, report mean values for the main categories of estimated costs and outcomes of interest, as well as mean differences between the comparator groups. If applicable, report incremental cost-effectiveness ratios.                                                                                                                | P11-12                          |
| Characterising uncertainty     | 20a     | <i>Single study-based economic evaluation:</i> Describe the effects of sampling uncertainty for the estimated incremental cost and incremental effectiveness parameters, together with the impact of methodological assumptions (such as discount rate, study perspective).                                                                           | P12-16                          |
|                                | 20b     | <i>Model-based economic evaluation:</i> Describe the effects on the results of uncertainty for all input parameters, and uncertainty related to the structure of the model and assumptions.                                                                                                                                                           | N/A                             |
| Characterising heterogeneity   | 21      | If applicable, report differences in costs, outcomes, or cost-effectiveness that can be explained by variations between subgroups of patients with different baseline characteristics or                                                                                                                                                              | N/A                             |

| Section/item                                                         | Item No | Recommendation                                                                                                                                                                                                                                    | Reported on page No/<br>line No |
|----------------------------------------------------------------------|---------|---------------------------------------------------------------------------------------------------------------------------------------------------------------------------------------------------------------------------------------------------|---------------------------------|
|                                                                      |         | other observed variability in effects that are not reducible by more information.                                                                                                                                                                 |                                 |
| <b>Discussion</b>                                                    |         |                                                                                                                                                                                                                                                   |                                 |
| Study findings, limitations, generalisability, and current knowledge | 22      | Summarise key study findings and describe how they support the conclusions reached. Discuss limitations and the generalisability of the findings and how the findings fit with current knowledge.                                                 | P17-21                          |
| <b>Other</b>                                                         |         |                                                                                                                                                                                                                                                   |                                 |
| Source of funding                                                    | 23      | Describe how the study was funded and the role of the funder in the identification, design, conduct, and reporting of the analysis. Describe other non-monetary sources of support.                                                               | P1                              |
| Conflicts of interest                                                | 24      | Describe any potential for conflict of interest of study contributors in accordance with journal policy. In the absence of a journal policy, we recommend authors comply with International Committee of Medical Journal Editors recommendations. | P2                              |

For consistency, the CHEERS statement checklist format is based on the format of the CONSORT statement checklist

# BMJ Open

## Cost-effectiveness of rapid laboratory-based mass-spectrometry diagnosis of bloodstream infection: Evidence from the RAPIDO randomized controlled trial

|                                 |                                                                                                                                                                                                                                                                                           |
|---------------------------------|-------------------------------------------------------------------------------------------------------------------------------------------------------------------------------------------------------------------------------------------------------------------------------------------|
| Journal:                        | <i>BMJ Open</i>                                                                                                                                                                                                                                                                           |
| Manuscript ID                   | bmjopen-2020-044623.R1                                                                                                                                                                                                                                                                    |
| Article Type:                   | Original research                                                                                                                                                                                                                                                                         |
| Date Submitted by the Author:   | 03-Sep-2021                                                                                                                                                                                                                                                                               |
| Complete List of Authors:       | Dixon, Padraig; Oxford University, Hollingworth, William; University of Bristol, School of Social and Community Medicine<br>Pike, Katie; Bristol University<br>Reynolds, Rosy; Bristol Medical School<br>Stoddart, Margaret; Southmead Hospital<br>MacGowan, Alasdair; Southmead Hospital |
| <b>Primary Subject Heading</b>: | Health economics                                                                                                                                                                                                                                                                          |
| Secondary Subject Heading:      | Infectious diseases                                                                                                                                                                                                                                                                       |
| Keywords:                       | HEALTH ECONOMICS, Diagnostic microbiology < INFECTIOUS DISEASES, Infection control < INFECTIOUS DISEASES                                                                                                                                                                                  |
|                                 |                                                                                                                                                                                                                                                                                           |

SCHOLARONE™  
Manuscripts



I, the Submitting Author has the right to grant and does grant on behalf of all authors of the Work (as defined in the below author licence), an exclusive licence and/or a non-exclusive licence for contributions from authors who are: i) UK Crown employees; ii) where BMJ has agreed a CC-BY licence shall apply, and/or iii) in accordance with the terms applicable for US Federal Government officers or employees acting as part of their official duties; on a worldwide, perpetual, irrevocable, royalty-free basis to BMJ Publishing Group Ltd ("BMJ") its licensees and where the relevant Journal is co-owned by BMJ to the co-owners of the Journal, to publish the Work in this journal and any other BMJ products and to exploit all rights, as set out in our [licence](#).

The Submitting Author accepts and understands that any supply made under these terms is made by BMJ to the Submitting Author unless you are acting as an employee on behalf of your employer or a postgraduate student of an affiliated institution which is paying any applicable article publishing charge ("APC") for Open Access articles. Where the Submitting Author wishes to make the Work available on an Open Access basis (and intends to pay the relevant APC), the terms of reuse of such Open Access shall be governed by a Creative Commons licence – details of these licences and which [Creative Commons](#) licence will apply to this Work are set out in our licence referred to above.

Other than as permitted in any relevant BMJ Author's Self Archiving Policies, I confirm this Work has not been accepted for publication elsewhere, is not being considered for publication elsewhere and does not duplicate material already published. I confirm all authors consent to publication of this Work and authorise the granting of this licence.

1  
2  
3  
4  
5  
6  
7  
8  
9  
10  
11  
12  
13  
14  
15  
16  
17  
18  
19  
20  
21  
22  
23  
24  
25  
26  
27  
28  
29  
30  
31  
32  
33  
34  
35  
36  
37  
38  
39  
40  
41  
42  
43  
44  
45  
46  
47  
48  
49  
50  
51  
52  
53  
54  
55  
56  
57  
58  
59  
60

# Cost-effectiveness of rapid laboratory-based mass-spectrometry diagnosis of bloodstream infection: Evidence from the RAPIDO randomized controlled trial

Padraig Dixon<sup>1\*</sup>, William Hollingworth<sup>2</sup>, Katie Pike<sup>3</sup>, Rosy Reynolds<sup>2</sup>, Margaret Stoddart<sup>4</sup>,

Alasdair MacGowan<sup>4,5</sup>

1 Nuffield Department of Primary Care Health Sciences, University of Oxford

2 Population Health Sciences, University of Bristol

3 Bristol Trials Centre (Clinical Trials and Evaluation Unit), University of Bristol

4 Infection Sciences, North Bristol NHS Trust, Bristol

5 School of Cellular and Molecular Medicine, University of Bristol

\*Corresponding author

Email: Padraig.Dixon@phc.ox.ac.uk

**Short title:** Cost-effectiveness of rapid bacteraemia identification

**Key words:** Bloodstream infection, randomised controlled trial, MALDI-TOF, mass spectrometry, cost-effectiveness.

**Word count:** 3,953

# Abstract

## Objectives and intervention

Bloodstream infection, the presence of viable microorganisms in the blood, is a prevalent clinical event associated with substantial mortality. Patient outcomes may be improved when the causative microorganism is identified quickly. We assessed the cost-effectiveness of rapid microbial identification by matrix-assisted laser desorption/ionisation time-of-flight (MALDI-TOF) mass spectrometry.

## Design

Economic evaluation alongside a randomised multicentre trial (RAPIDO: RAPId Diagnosis on Outcome) assessing the impact of rapid identification by MALDI-TOF spectrometry.

## Setting

Adult in-patients with bloodstream infections at seven NHS hospital trusts in England and Wales.

## Primary outcome

Net monetary benefit, estimated as incremental costs compared with incremental 28-day survival, of rapid identification by MALDI-TOF spectrometry compared to conventional identification.

## Methods

Patients were randomised (1:1) to receive diagnosis by conventional methods of microbial identification (conventional arm) only or by MALDI-TOF spectrometry in addition to conventional identification (RAPIDO arm).

## Results

Data from 5,550 patients were included in primary analysis. Mean imputed costs in 2018/19 prices per patient were lower by £126 in the RAPIDO arm (95% CI: -£784 to £532) but the proportion of patients alive at day 28 was lower (81.5% versus 82.3%). The probability of cost-

1  
2 effectiveness of MALDI-TOF was <0.5 at cost-effectiveness thresholds between £20,000 and  
3  
4 £50,000.  
5

## 6 7 **Conclusions**

8  
9  
10 Adjunctive MALDI-TOF diagnosis was unlikely to be cost-effective when measured as cost per  
11  
12 death avoided at 28 days. However, the differences between arms in cost and effect were  
13  
14 modest, associated with uncertainty, and may not accurately reflect “real-world” routine use of  
15  
16 MALDI-TOF technology in this patient group.  
17

18  
19  
20  
21  
22 Trial registration/reference: ISRCTN 97107018 / UKCRN 11978  
23

## 24 25 **Strengths and limitations of this study**

26  
27  
28 We report an economic evaluation of the first randomized controlled trial of adjunctive matrix-  
29  
30 assisted laser desorption/ionisation time of flight (MALDI-TOF) mass spectrometry identification  
31  
32 of the causative microorganism in bloodstream infection.  
33

34  
35 Data on 5,550 patients from the RAPIDO (RAPId Diagnosis on Outcome) trial were used to  
36  
37 estimate the cost-effectiveness of MALDI-TOF in comparison to conventional microbiological  
38  
39 methods.  
40

41  
42  
43 Patients were randomized on a 1:1 basis to conventional or adjunctive identification once a  
44  
45 positive blood culture was obtained.  
46

47  
48 We estimated the net monetary benefit, calculated as incremental costs compared with  
49  
50 incremental 28-day survival, of rapid identification by adjunctive MALDI-TOF spectrometry  
51  
52 compared to conventional identification.  
53

54  
55 We calculated the cost-effectiveness of the intervention in subgroups defined by the clinical  
56  
57 significance of the infection  
58  
59  
60

## Background

Bloodstream infection refers to the presence, confirmed by laboratory testing, of viable microorganisms in the bloodstream. These infections are both prevalent and clinically significant. There are estimated to be approximately 1.2 million annual episodes of bloodstream infection in Europe, 500,000 in North America <sup>1</sup>, and 100,000 in England and Wales <sup>2</sup>. Estimates of overall mortality range from 15-25% at 30 days post-infection to almost 50% at 12-36 months after infection <sup>3-6</sup>.

Rapid identification of the causative microbial pathogen may be associated with improved patient outcomes <sup>7 8</sup>. The RAPIDO trial assessed the impact of laboratory-based RAPID Diagnosis on Outcome of bloodstream infections in hospitalised adult patients at seven NHS Hospital Trusts in England and Wales <sup>2</sup>. Rapid diagnosis was by matrix-assisted laser desorption/ionisation time-of-flight (MALDI-TOF) mass spectrometry applied to machine-positive blood cultures. Here we report the results of an economic evaluation of this trial, from an NHS perspective. Its purpose was to estimate the cost-effectiveness of using MALDI-TOF technology in addition to conventional microbiological techniques compared to conventional approaches alone.

## Methods

Trial methods were described in MacGowan et al <sup>2</sup> and are summarised here.

### Design

RAPIDO was a multicentre prospective randomised (1:1) non-blinded parallel-group trial comparing two approaches to identification of the causative microorganism(s) of bloodstream infection in hospitalised adult patients at seven centres in England and Wales. The primary outcome was 28-day survival, and the two approaches were MALDI-TOF spectrometry in addition to conventional microbiological culture ('RAPIDO' arm) or conventional culture only ('Conventional' arm).

### Setting and participants

Adult patients aged  $\geq 18$  years, admitted to hospital for NHS care, and with a blood sample culture-positive for bacteria or fungi were potentially eligible for inclusion, whether or not the



1 organisms were considered clinically significant. Patients were not eligible if they were on an  
2 end-of-life pathway, had been previously randomised in the study, were prisoners or young  
3 offenders in the custody of the prison service, if the attending physician deemed them  
4 unsuitable, or if the positive blood culture entered the diagnostic pathway 'out of hours' when  
5 both MALDI-TOF and conventional identification methods were not equally available for use.  
6 Patients were randomised on a 1:1 basis to either the Conventional or RAPIDO arm.  
7  
8  
9  
10  
11  
12  
13  
14

15 In order to initiate rapid diagnosis quickly, the study design required prompt randomisation when  
16 blood cultures flagged positive, so it was necessary to seek consent retrospectively. Research  
17 nurses approached patients for consent when they were sufficiently recovered and had capacity,  
18 in the opinion of both the clinical team and the research nurse. If a patient did not have capacity,  
19 but was thought likely to regain it, then nurses waited for capacity to return. Otherwise, a relative  
20 or close friend of the patient was approached as consultee, if available. If patients with capacity  
21 were discharged to independent living before consent could be obtained, consent was sought by  
22 post.  
23  
24  
25  
26  
27  
28  
29  
30  
31  
32

### 33 Patient and public involvement

34 The public and patient panel involvement group for microbiology at North Bristol NHS Trust was  
35 consulted on study design and the material given to patients.  
36  
37  
38  
39

### 40 Intervention

41 Samples in both arms of the trial were tested by the conventional methods in routine use at the  
42 microbiology laboratory of the centre concerned, starting with incubation in a blood culture  
43 machine. Each laboratory's standard operating procedures defined the choice of appropriate  
44 biochemical tests and antimicrobial panels, depending on all the information about the organism  
45 available at the time.  
46  
47  
48  
49  
50  
51  
52

53 In the RAPIDO arm, samples were first also tested by MALDI-TOF mass spectrometry, which is  
54 a relatively new technology for the identification of microbial organisms.<sup>9</sup> Identification may be  
55 achieved within minutes, a much shorter time than for conventional identification.<sup>9</sup> Microbial  
56 material was tested on Bruker Microflex MALDI-TOF mass spectrometers running Realtime  
57  
58  
59  
60

1  
2 Classification software version 3.1 with database version 3 (version 4 from February 2014;  
3  
4 Bruker Daltonik GmbH, Bremen, Germany).  
5  
6

## 7 **Data collection and outcomes**

8  
9 Research nurses and laboratory staff collected data on paper data capture forms for later entry  
10  
11 to a web-based database. Detailed data collection lasted from day 0 to day 7 after blood  
12  
13 sampling, or discharge or death if earlier, and continued until day 28 for the key outcomes of  
14  
15 death, discharge and *C. difficile* infection, and for laboratory data if necessary.  
16  
17

18  
19 Key clinical data relevant to the economic evaluation included dates of admission, blood  
20  
21 sampling (date 0), discharge and death, allowing calculation of duration of stay both before and  
22  
23 up to 28 days after the onset of bloodstream infection. All relevant antimicrobial prescriptions  
24  
25 were recorded from day 0 to day 7 including drug names, doses, routes and frequencies of  
26  
27 administration, and the number of doses actually taken on each day. Ward speciality was  
28  
29 recorded for the ward where the patient spent most of each day up to day 7.  
30  
31

32  
33 For the economic analysis, the trial's survival outcome was expressed as the proportion of  
34  
35 patients alive at 28 days, so that the cost-effectiveness results could be interpreted as the  
36  
37 incremental cost per percent change in the proportion of patients alive at 28 days.  
38  
39

## 40 Measurement and valuation of resource use

41  
42 The economic analysis took a health system (i.e. NHS) secondary-care perspective for costs.  
43  
44 The time horizon for the economic analysis was up to 28 days. Costs and outcomes were  
45  
46 therefore not discounted. Costs were first calculated in 2012/13 prices to reflect the structure of  
47  
48 relative costs within the NHS during the first year of participant recruitment into the RAPIDO  
49  
50 RCT. These costs were then inflated to 2018/19 levels. Costs from 2012/13 to 2015/2016 were  
51  
52 inflated using the hospital and community health services (HCHS) index <sup>10</sup>. This index was  
53  
54 replaced in 2016 by the NHS cost inflation index (NHSCII) which was used to inflate prices from  
55  
56 2015/16 to the 2018/19 prices. Supplementary material contains results for the uninflated  
57  
58 2012/13 price levels.  
59  
60

1  
2 The measured components of NHS costs in each arm were: diagnostic testing (reflecting  
3 differences in the technology randomly allocated for sample diagnosis); length of stay for initial  
4 admission and ward type (reflecting different levels of intensity of clinical support); and  
5 antimicrobials prescribed. Further details are available in the supplementary material.  
6  
7  
8  
9

### 10 11 Diagnostic testing

12 Patients in both arms of the study had conventional diagnostic blood testing. The costs of the  
13 conventional approach to diagnosis are 'bundled' within NHS reference cost and tariffs  
14 categories for hospital admissions. To avoid double counting of these costs, the costs of  
15 conventional diagnosis were not separately calculated. The unit cost of identifying an organism  
16 directly from a machine-positive blood sample using MALDI-TOF was calculated using a  
17 microcosting exercise, described further in the supplementary material.  
18  
19  
20  
21  
22  
23  
24  
25  
26

### 27 Length of stay and ward type

28 Data on the speciality of the ward on which patients were located was recorded up to the  
29 seventh day after the positive blood sample was taken. Unit costs by ward type are not provided  
30 in national data sources such as NHS Reference Costs.<sup>11</sup> The closest analogue in NHS  
31 Reference Costs is that of 'Service Description', which groups together related procedures. The  
32 coded ward specialities were therefore matched to the closest category of 'Service Description'  
33 contained in NHS Reference Costs.  
34  
35  
36  
37  
38  
39  
40  
41

42 For each Service Description, we calculated a per-day cost as the average of the costs for  
43 relevant currency codes (which combine patients with similar cost implications) weighted by the  
44 frequency of codes as reported in NHS Reference Costs. We also accounted for the  
45 remuneration of hospitals according to the length of stay of patients, and for differences in  
46 elective and non-elective care. Further details are provided in the supplementary information  
47 section.  
48  
49  
50  
51  
52  
53  
54

55 We estimated ward costs between day seven (the last day at which ward type was recorded)  
56 and day 28 (the point at which the primary outcome of the RCT was measured) by a simple  
57 extrapolation. This involved assuming that, for those patients known to survive to at least day 7,  
58  
59  
60

1  
2 that the day 7 ward type was the ward type on which patients were located until the earliest of  
3  
4 discharge, death or day 28. We assess the sensitivity of the results to this assumption by  
5  
6 comparing the primary outcome to costs at 7 days.  
7  
8

### 9 Antimicrobial use

10 Antimicrobial drugs administered were costed to 2012/13 prices using the British National  
11  
12 Formulary <sup>12</sup> and then inflated as with other costs to 2018/19. A per-patient, per-day  
13  
14 antimicrobial cost was calculated from the recorded prescriptions and number of doses taken  
15  
16 each day.  
17  
18

### 19 **Analytical methods**

20 We adopted an intention-to-treat approach to analysis, in which all costs and outcomes were  
21  
22 analysed according to the diagnostic pathway to which participants' samples were randomised,  
23  
24 rather than the pathway actually followed. All analysis was conducted using Stata version 15.1  
25  
26 (StataCorp, College Station, Texas, USA).  
27  
28  
29

### 30 Imputation of missing data

31 The amount of missing data was modest for patients who provided consent. Mortality data at 28  
32  
33 days was available for all but two patients. Information on allocation was complete. Data  
34  
35 necessary to cost ward stays was incomplete in 4% of cases, and in 12% of cases for  
36  
37 antimicrobials. Logistic regression analysis confirmed that for each cost category this  
38  
39 missingness was unrelated to randomised allocation; odds ratios (95% confidence intervals) for  
40  
41 missing ward and antimicrobial data were 1.09 (0.80 to 1.49) and 0.93 (0.79 to 1.09),  
42  
43 respectively. We used mean imputation, stratified by allocation, in order to include these data  
44  
45 points in the complete case analysis.  
46  
47  
48  
49

50  
51 Our base-case analysis used multiple imputation. Of the 5,550 patients in the analysis  
52  
53 population, 19.5% (n=1,082) were eligible but unapproached survivors. Only very limited  
54  
55 baseline information was available for these patients, in accordance with the ethical approvals  
56  
57 received, but their mortality outcome was known. Our base-case analysis used multiple  
58  
59 imputation to estimate the 28-day and 7-day costs of the 1,082 unapproached survivors.  
60

1  
2 Multiple imputation by chained equations was implemented in Stata 15.1 using the `–ice –`  
3  
4 `command`.<sup>13 14</sup> The imputation model was stratified by trial arm and included all variables for  
5  
6 which there was complete information on the 5,550 analysis sample patients (centre, sex, age,  
7  
8 and consent status) and total cost at 7 and 28 days for available cases. We also included the 28-  
9  
10 day mortality outcome. We assumed that the two patients for whom the mortality outcome was  
11  
12 censored before day 28 had died by day 28. Predictive mean matching<sup>13</sup> was used to allow for  
13  
14 non-normal distributions of the cost variables. Costs were imputed at the level of 7- and 28-day  
15  
16 costs, rather than for the underlying disaggregated components of these costs. The number of  
17  
18 imputations (n=30) was selected to be larger than 100 times the proportion of missing data.<sup>13</sup> We  
19  
20 reflected variation within and between the imputed datasets in the analysis using the methods  
21  
22 described by Faria et al.<sup>15</sup>  
23  
24  
25

### 26 Cost-effectiveness analysis

27  
28 Cost-effectiveness analyses were conducted using seemingly unrelated regressions, in which  
29  
30 the outcomes of NHS costs and the proportion of patients alive at 28 days were calculated  
31  
32 jointly. We obtained estimates of the mean difference between arms and their standard errors  
33  
34 from these regressions, which we used in calculation of the net monetary benefit of the  
35  
36 intervention compared to conventional identification. "In the absence of a survival or mortality-  
37  
38 specific threshold, we estimated net monetary benefit (NMB) at a range of threshold values  
39  
40 (£5,000, £10,000, £20,000, £30,000 and £50,000 per death avoided at 28 days). To quantify  
41  
42 uncertainty, we calculated confidence intervals around point estimates of net benefit, and  
43  
44 constructed cost-effectiveness acceptability curves.  
45  
46

47  
48 We undertook a number of sensitivity analyses. We calculated net benefit excluding the group of  
49  
50 eligible but unapproached survivor patients. We also calculated cost-effectiveness at seven days  
51  
52 (rather than 28) with and without this group of patients in order to assess whether our findings in  
53  
54 the base-case were substantially affected by our extrapolation of ward costs beyond day 7 for  
55  
56 participants surviving to this point.  
57  
58  
59  
60

## Subgroup analysis

We undertook one pre-specified subgroup analysis to examine the clinical significance of the infection episode. A positive blood culture may reflect the presence of pathogenic organisms multiplying in the patient's bloodstream (clinically significant infection), or an incidental contamination of the blood sample during blood sampling or laboratory processing (not clinically significant). One may imagine relatively higher near-term costs and potentially worse survival outcomes if the infection is clinically significant. The subgroup analysis offers a test of this hypothesis.

We followed the regression-based methods for subgroup analysis set out by Willan et al.<sup>16</sup> by introducing a factorial subgroup/allocation interaction into the cost and effect equations. In addition to calculating the probability of intervention cost-effectiveness for each subgroup, we also inspected the p-value associated with the interaction term in each regression for evidence of effect modification by subgroup. This analysis necessarily excluded the unapproached survivor group for whom information on clinical significance was unavailable.

## **Results**

A total of 14,298 samples were presented for screening as first machine-positive samples from adult patients during the study period. From this total, 5,670 samples were excluded as occurring out-of-hours and the remaining 8,628 samples were randomised to either RAPIDO (n=4,312) or Conventional identification (n=4,316). Excluding those who were ineligible or declined consent resulted in an analysis population of 5,550 patients (2,740 RAPIDO, 2,810 Conventional). An unexpectedly large group of patients survived to at least day 28 but were not approached for consent because they lacked capacity and no suitable consultee could be found for them. The analysis population of 5,550 included 1,082 eligible but unapproached survivors (543 RAPIDO, 539 Conventional).

## Outcomes

A slightly higher proportion of patients died by 28 days in the RAPIDO group (18.5% or 508/2,470) than in the Conventional group (17.7% or 497/2,810). The hazard ratio (calculated from Cox proportional hazards regression) was 1.05 (95% CI: 0.93 to 1.19, p=0.42). Median

time to discharge (up to 28 days) was 15 days in both arms (hazard ratio=0.98; 95% CI: 0.90 to 1.06).

There was limited deviation from the protocol with respect to diagnostic pathway: the correct diagnostic pathway was not followed for 6.1% of patients in the intervention arm (133/2196) and 2.1% in the control arm (48/2271).

### Costs

Costs from available cases, after mean imputation but before multiple imputation, are presented in *Table 1*. Costs are similar between arms, with the intervention having slightly lower total costs (the sum of intervention, antimicrobial and ward costs) at 7 and 28 days.

Table 1 Costs in available cases

| Mean cost           | Control<br>(N=2,271) | RAPIDO<br>(N=2,197) | Difference (95% CI) <sup>a</sup> |                 |
|---------------------|----------------------|---------------------|----------------------------------|-----------------|
| Intervention cost   | -                    | £7                  | +£7                              |                 |
| Antimicrobial cost  | £272                 | £292                | +£18                             | (-£6 to £46)    |
| 7-day ward costs    | £3,805               | £3,757              | -£49                             | (-£182 to £85)  |
| Total 7-day costs   | £4,077               | £4,055              | -£22                             | (-£163 to £112) |
| 28-day ward costs   | £9,325               | £9,282              | -£43                             | (-£557 to £471) |
| Total 28-days costs | £9,597               | £9,580              | -£17                             | (-£537 to £503) |

**Note:** <sup>a</sup> Confidence intervals around mean differences calculated from unadjusted linear regression

Estimated costs following multiple imputation are presented in *Table 2*.

Table 2 Costs following multiple imputation (based on 30 imputed datasets of N=5,550)

| Mean cost           | Control<br>(N=2,810) | RAPIDO<br>(N=2,740) | Difference (95% CI) <sup>a</sup> |                 |
|---------------------|----------------------|---------------------|----------------------------------|-----------------|
| Total 7-day costs   | £3,667               | £3,576              | -£82                             | (-£321 to £157) |
| Total 28-days costs | £8,253               | £8,139              | -£114                            | (-£773 to £545) |

**Note:** <sup>a</sup> Confidence intervals around mean differences calculated from unadjusted linear regression

### Cost-effectiveness and sensitivity analysis

In the base-case imputed analysis, estimated mean costs per patient were lower in the RAPIDO arm (mean difference -£126; 95% CI: -£784 to £532), and the proportion of patients alive at day 28 was also lower (81.4% vs 82.3%, see *Table 3*). Ward costs, including the costs of

conventional microbiological testing, constituted 97% of total costs in each arm. Most of the remaining 3% of total cost was attributable to antimicrobial costs. The estimated per-patient cost of diagnosis using MALDI-TOF constituted a negligible proportion of overall per-patient mean costs in the intervention arm.

Table 3 Costs and outcome: base-case analysis with imputation (N=5,550)

|                              | Control | RAPIDO | Difference (95% CI)      |
|------------------------------|---------|--------|--------------------------|
| Mean 28-day NHS costs        | £ 8,259 | £8,113 | -£126 (-£784 to £532)    |
| 28-day survival <sup>a</sup> | 0.823   | 0.814  | -0.009 (-0.029 to 0.011) |

**Note:** <sup>a</sup>Survival measured as the proportion of patients alive at day 28.

Table 4 Cost-effectiveness: base-case analysis with imputation (N=5,550)

| Threshold <sup>a</sup> | Net monetary benefit (95% CI) | Probability of cost-effectiveness |
|------------------------|-------------------------------|-----------------------------------|
| £5,000                 | £83 (-£567 to £733)           | 0.59                              |
| £10,000                | £40 (-£625 to £706)           | 0.55                              |
| £20,000                | -£45 (-£783 to £692)          | 0.45                              |
| £30,000                | -£131 (-£984 to £721)         | 0.38                              |
| £50,000                | -£303 (-£1,460 to £855)       | 0.30                              |

**Note:** <sup>a</sup>Threshold value = 28-day cost per death avoided at 28 days.

The probability of the RAPIDO intervention being cost-effective declines with increasing threshold values of cost per death avoided at 28 days, as shown in

Figure 1 and Table 4.

Figure 1 Cost-effectiveness acceptability curve for base case

Table 5 and Table 6 report the results of the various sensitivity analyses. These analyses, expressed as net monetary benefit (with associated 95% confidence intervals), do not differ substantially from the base-case results. Estimating costs at seven rather than 28 days did not alter the overall cost-effectiveness conclusions.

### Subgroup analysis

Table 7 and Table 8 present the results of the subgroup analysis comparing clinically significant and clinically non-significant episodes of bloodstream infection. Statistical tests for interaction showed no evidence of a subgroup effect (p-value for interaction in the cost seemingly unrelated



1  
2 regression equation=0.32, p-value in the outcome seemingly unrelated regression equation  
3  
4 =0.66), and estimates of difference between Conventional and RAPIDO diagnosis in both  
5  
6 outcome and costs were broadly similar for the clinically significant and clinically non-significant  
7  
8 subgroups.  
9

10  
11  
12  
13  
14  
15  
16  
17  
18  
19  
20  
21  
22  
23  
24  
25  
26  
27  
28  
29  
30  
31  
32  
33  
34  
35  
36  
37  
38  
39  
40  
41  
42  
43  
44  
45  
46  
47  
48  
49  
50  
51  
52  
53  
54  
55  
56  
57  
58  
59  
60

For peer review only

Table 5 Sensitivity analysis: costs and outcome

|                                  |            | Excluding unapproached survivors,<br>N=4,468, cost at 28 days |                    | Excluding unapproached survivors,<br>N=4,468, cost at 7 days |                    | Including unapproached survivors,<br>N=5,550, cost at 7 days |                    |
|----------------------------------|------------|---------------------------------------------------------------|--------------------|--------------------------------------------------------------|--------------------|--------------------------------------------------------------|--------------------|
| NHS costs<br>mean (95% CI)       | Control    | £9,604                                                        | (£9,243 to £9,967) | £4,079                                                       | (£3,982 to £4,117) | £3,669                                                       | (£3,500 to £3,836) |
|                                  | RAPIDO     | £9,572                                                        | (£9,204 to £9,441) | £4,053                                                       | (£3,953 to £4,153) | £3,574                                                       | (£3,378 to £3,770) |
|                                  | Difference | -£33                                                          | (-£549 to £484)    | -£26                                                         | (-£166 to £113)    | -£95                                                         | (-£358 to £168)    |
| 28-day survival<br>mean (95% CI) | Control    | 0.78                                                          | (0.76 to 0.80)     | 0.78                                                         | (0.76 to 0.80)     | 0.82                                                         | (0.81 to 0.84)     |
|                                  | RAPIDO     | 0.77                                                          | (0.75 to 0.79)     | 0.77                                                         | (0.75 to 0.79)     | 0.81                                                         | (.80 to 0.83)      |
|                                  | Difference | -0.01                                                         | (-0.04 to 0.01)    | -0.01                                                        | (-0.04 to -0.01)   | -0.01                                                        | (-0.03 to 0.01)    |

Table 6 Sensitivity analysis: cost effectiveness

| Threshold <sup>a</sup> | Excluding unapproached survivors, N=4,468, cost<br>at 28 days |                   |                  | Excluding unapproached survivors,<br>N=4,468, cost at 7 days |                   |      | Including unapproached survivors, N=5,550, cost at<br>7 days |                   |      |
|------------------------|---------------------------------------------------------------|-------------------|------------------|--------------------------------------------------------------|-------------------|------|--------------------------------------------------------------|-------------------|------|
|                        | NMB                                                           | (95% CI)          | PCE <sup>b</sup> | NMB                                                          | (95% CI)          | PCE  | NMB                                                          | (95% CI)          | PCE  |
| £5,000                 | -£29                                                          | (-£533 to £475)   | 0.46             | -£35                                                         | (-£206 to £136)   | 0.34 | £52                                                          | (-£222 to £326)   | 0.65 |
| £10,000                | -£91                                                          | (-£611 to £430)   | 0.37             | -£97                                                         | (-£359 to £165)   | 0.23 | £9                                                           | (-£314 to £332)   | 0.52 |
| £20,000                | -£214                                                         | (-£841 to £414)   | 0.25             | -£220                                                        | (-£706 to £267)   | 0.19 | -£77                                                         | (-£551 to £398)   | 0.38 |
| £30,000                | -£337                                                         | (-£1,135 to £461) | 0.20             | -£343                                                        | (-£1,067 to £381) | 0.18 | -£163                                                        | (-£817 to £492)   | 0.31 |
| £50,000                | -£583                                                         | (-£1799 to -£634) | 0.17             | -£589                                                        | (-£1,796 to £618) | 0.17 | -£334                                                        | (-£1,373 to £705) | 0.26 |

**Notes:** <sup>a</sup>Threshold value = cost per death avoided at 28 days; <sup>b</sup>NMB = net monetary benefit [mean (95% confidence interval)]; <sup>c</sup>PCE = probability of cost-effectiveness at given threshold.

Table 7 Subgroup analysis: costs and outcome

|                                   |            | All (unapproached survivors excluded)<br>N=4,468 |                    | Clinically significant episodes only<br>N=3,010 (67%) |                     | Clinically non-significant episodes only<br>N=1,458 (33%) |                     |
|-----------------------------------|------------|--------------------------------------------------|--------------------|-------------------------------------------------------|---------------------|-----------------------------------------------------------|---------------------|
| 28-day NHS costs<br>mean (95% CI) | Control    | £9,604                                           | (£9,243 to £9,967) | £9,456                                                | (£8,991 to £9,922)  | £9,451                                                    | (£8,786 to £10,116) |
|                                   | RAPIDO     | £9,572                                           | (£9,204 to £9,441) | £9,618                                                | (£9,134 to £10,102) | £9,047                                                    | (£8,399 to £9,696)  |
|                                   | Difference | -£33                                             | (-£549 to £484)    | £161                                                  | (-£469 to £791)     | -£404                                                     | (-£1,308 to £501)   |
| 28-day survival<br>mean (95% CI)  | Control    | 0.78                                             | (0.76 to 0.80)     | 0.78                                                  | (0.76 to 0.79)      | 0.80                                                      | (0.77 to 0.83)      |
|                                   | RAPIDO     | 0.77                                             | (0.75 to 0.79)     | 0.77                                                  | (0.75 to 0.79)      | 0.78                                                      | (0.75 to 0.81)      |
|                                   | Difference | -0.01                                            | (-0.04 to 0.01)    | -0.01                                                 | (-0.04 to 0.02)     | -0.02                                                     | (-0.06 to 0.02)     |

Table 8 Subgroup analysis: cost effectiveness at 28 days

| Threshold<br>value <sup>a</sup> | All (unapproached survivors excluded) N=4,468 |                   |                  | Clinically significant episodes only N=3,010 (67%) |                     |      | Clinically non-significant episodes only N=1,458<br>(33%) |                     |      |
|---------------------------------|-----------------------------------------------|-------------------|------------------|----------------------------------------------------|---------------------|------|-----------------------------------------------------------|---------------------|------|
|                                 | NMB <sup>b</sup>                              | (95% CI)          | PCE <sup>c</sup> | NMB                                                | (95% CI)            | PCE  | NMB                                                       | (95% CI)            | PCE  |
| £5,000                          | -£29                                          | (-£533 to £475)   | 0.46             | -£206                                              | (-£853 to £441)     | 0.27 | £301                                                      | (-£629 to £1,231)   | 0.74 |
| £10,000                         | -£91                                          | (-£611 to £430)   | 0.37             | -£250                                              | (-£947 to £446)     | 0.24 | £198                                                      | (-£803 to £1,199)   | 0.65 |
| £20,000                         | -£214                                         | (-£841 to £414)   | 0.25             | -£339                                              | (-£1,206 to £527)   | 0.22 | -£9                                                       | (-£1,254 to £1,237) | 0.49 |
| £30,000                         | -£337                                         | (-£1,135 to £461) | 0.20             | -£428                                              | (-£1,521 to £664)   | 0.22 | -£215                                                     | (-£1,785 to £1,355) | 0.39 |
| £50,000                         | -£583                                         | (-£1799 to -£634) | 0.17             | -£606                                              | (-£2,222 to £1,010) | 0.23 | -£627                                                     | (-£2,949 to £1,694) | 0.30 |

<sup>a</sup>Threshold value = cost per death avoided at 28 days; <sup>b</sup>NMB = net monetary benefit [mean (95% confidence interval)]; <sup>c</sup>PCE = probability of cost-effectiveness at given threshold.

## Discussion

Bloodstream infections are significant, prevalent clinical events associated with substantial morbidity, <sup>1</sup> mortality <sup>17</sup> and medical cost.<sup>18</sup> There are an estimated 1.2 million episodes of bloodstream infection and 157,000 associated deaths per year in Europe.<sup>1</sup> Identification of the aetiological agent is a critical step in the treatment of bloodstream infection.

We performed a within-trial economic evaluation of MALDI-TOF diagnostic technology for the rapid identification of the causative microbial agent in hospitalised patients with bloodstream infection, excluding patients with cultures not positive for growth. The trial's primary outcome of 28-survival was consistent with no difference between conventional and adjunctive MALDI-TOF identification. The economic analysis showed that the intervention was not likely to be cost-effective, measured using incremental cost and incremental 28-day survival. The subgroup analysis suggested that there were no differences in the cost-effectiveness of MALDI-TOF when accounting for the clinical significance of the infection.

However, the differences between arms were modest and associated with considerable uncertainty. It is important therefore to reflect on whether the use of this technology outside trial conditions might alter the conclusions of the within-trial evaluation. One consideration is that a higher MALDI-TOF throughput of machine-positive blood samples would reduce the overall cost per sample in the intervention arm. A value for the number of samples likely to be encountered in routine use was not included in the unit cost calculation in this study because of the exclusion criteria used in the trial: for example, it considered only samples from patients aged 18 and over. A reduction in the direct cost of MALDI-TOF would lower the intervention cost towards that of conventional diagnosis, but would not change patient outcomes.

Our economic evaluation did not calculate the cost of per-sample of conventional identification separately, since such costs are bundled into the ward stay costs and their inclusion would have amounted to double counting. By contrast, the intervention arm involved the use of MALDI-TOF in addition to conventional diagnosis, and hence the per-sample costs of MALDI-TOF are incremental to costs in the control arm. However, as MALDI-TOF has been increasingly adopted

1  
2 in routine practice, experience shows that it is not, in fact, used as an adjunct to conventional  
3 approaches, but largely displaces them. In addition, its widespread adoption for use with  
4 samples from much more common infections (e.g. urinary tract infections) reduces its per-  
5 sample costs overall.  
6  
7  
8  
9

10  
11 As a rough indication of the possible magnitudes of displacement that could be involved  
12 specifically for blood cultures, MALDI-TOF offered a usable identification of some 83% of first-  
13 bottle samples in the trial, and few of these samples would merit conventional identification in  
14 addition. Of the remaining 17% of samples, it is likely that, after further culture to produce  
15 colonial isolates, most would be successfully tested by MALDI-TOF without recourse to  
16 conventional biochemical methods.  
17  
18  
19  
20  
21  
22  
23

24  
25 Other considerations suggest that the incremental cost of MALDI-TOF compared to conventional  
26 identification could be smaller in “real-world” contexts than that identified in the RAPIDO trial.

27  
28 Longer term reductions in capital, labour and consumable inputs could not be measured within  
29 the period of trial-follow-up and are not reflected in the economic evaluation. For example, the  
30 MALDI-TOF process requires less physical space in the laboratory compared to conventional  
31 approaches, and a substantial long-term switch to the new technology would reduce the capital  
32 costs of microbiology laboratories, as would reductions in the cost of MALDI-TOF machines that  
33 may come from wider use and greater market competition. Changes in workflow using MALDI-  
34 TOF reduce the time required from laboratory staff to complete an identification, meaning that  
35 results can be supplied significantly faster to clinical staff on wards (a median of 35.6 hours after  
36 taking the blood sample using MALDI-TOF compared to 54.5 hours using conventional methods  
37 in the RAPIDO trial,  $p < 0.0001$  from a Wilcoxon test given violation of the proportional hazards  
38 assumption for this outcome).  
39  
40  
41  
42  
43  
44  
45  
46  
47  
48  
49  
50  
51

52  
53 Against this, it is important to note that ward costs accounted for 97% of all secondary care  
54 costs, and the absence of a significant effect of MALDI-TOF diagnosis in reducing the length of  
55 stay and improving survival is a central conclusion of the trial – and one that merits analysis in  
56 future research (discussed below). Without evidence for improvements in these outcomes,  
57  
58  
59  
60

1  
2 reductions in the costs of MALDI-TOF diagnosis are plausible but may not materially alter the  
3  
4 conclusions of our analysis.  
5

## 6 7 **Strengths and limitations** 8

### 9 10 Strengths

11 To our knowledge, this is the first economic evaluation conducted alongside a randomised  
12  
13 clinical trial evaluating MALDI-TOF for rapid identification as an addition to conventional  
14  
15 microbiological and biochemical methods in bloodstream infection. There has been much  
16  
17 observational evidence on the effects of MALDI-TOF technology on non-health outcomes such  
18  
19 as time to identification, but there is a lack of trial-based evidence on the costs and cost-  
20  
21 effectiveness of using MALDI-TOF in clinical contexts.<sup>19</sup>  
22  
23

24  
25 The cost-effectiveness analysis was conducted on a large dataset offering individual-level cost  
26  
27 data on thousands of patients. The costing of the intervention itself was supported by a time and  
28  
29 motion observational study conducted at one of the trial sites, while ward and antimicrobial data  
30  
31 were valued using nationally representative data sources.  
32  
33

### 34 35 Limitations

36 Mortality data was censored at 28 days, and information on ward type (by far the biggest cost  
37  
38 driver) at seven days. We lacked the information necessary to examine longer-term costs and  
39  
40 outcomes, albeit there is little reason to suspect that survival curves would diverge after 28 days  
41  
42 to alter the primary survival outcome of the trial.  
43  
44

45  
46 The cost analysis depended on a matching of the ward descriptions reported in the trial dataset  
47  
48 to 'Service Descriptions' in NHS Reference Costs. This matching process was performed 'blind'  
49  
50 to allocation, but the analysis of 28-day costs required an extrapolation from seven days to the  
51  
52 earliest of death, discharge or the 28-day end-point. Unobserved changes in ward type after day  
53  
54 7 could change the estimated costs used in the base case, although no substantial difference  
55  
56 was observed when comparing 28-day and 7-day analyses.  
57  
58

59 We did not have access to primary care records so our analysis was limited to a secondary care  
60  
NHS perspective i.e. hospital resource use. In practice, because of the magnitude of per-day

1  
2 ward costs, it is unlikely that accounting for other health system costs would have a material  
3  
4 impact on our findings, given that the mortality outcome favoured conventional diagnosis.  
5

6  
7 Patients who were unable to consent for themselves and for whom no consultee was available  
8  
9 comprised 19.5% (n=1,082) of the 5,550 patients in the analysis population, and no data beyond  
10  
11 the mortality outcome, allocation, age and sex was available for them. However, apart from this  
12  
13 group of patients, and the absence of ward-specific data between days 8 and 28, the amount of  
14  
15 missing data in key cost drivers was limited.  
16

17  
18 The multiple imputation model estimated that these 1,082 patients had lower mean costs than  
19  
20 the other 4,468 participants. Is this plausible? On the one hand, costs should be expected to  
21  
22 diverge between the two groups given that the 1,082 patients who did not provide consent are all  
23  
24 known to have survived for at least 28 days. Thus, the lower costs generated by the imputation  
25  
26 model may reflect a population less acutely ill than the other participants. On the other hand,  
27  
28 prolonged survival without discharge would give rise to higher costs than early death during the  
29  
30 trial period.  
31  
32

33  
34 These considerations complicate assessments of direction of the biases in the available case  
35  
36 data. However, the conclusions that emerge from the multiple imputation results, the available  
37  
38 case results, and the various sensitivity analyses are similar in identifying considerable  
39  
40 uncertainty around the cost-effectiveness of MALDI-TOF in this patient group.  
41  
42

43  
44 Finally, the economic evaluation was limited to identifying the cost-effectiveness of the  
45  
46 intervention and did not identify the mechanisms that gave rise to the survival outcomes in the  
47  
48 trial. Evidence from the analysis of secondary clinical outcomes in the RAPIDO trial indicates  
49  
50 that time to provision of microbiological identification to the ward was significantly shorter in the  
51  
52 RAPIDO arm and there was weak evidence of longer time to initiation of appropriate  
53  
54 antimicrobial therapy in the RAPIDO arm (median 24.0 versus 13.0 hours,  $p=0.056$  based on a  
55  
56 Cox proportional hazards model ). However, there was no significant difference between arms in  
57  
58 other secondary outcomes: time to providing Gram stain and antimicrobial susceptibility results  
59  
60 to the ward; time to resolution of fever (up to seven days) or discharge (up to 28 days); C.

1  
2 *difficile* incidence (to 28 days); in-hospital antimicrobial consumption (to seven days) or the  
3  
4 proportion of patients remaining on broad-spectrum therapy at seven days <sup>2</sup>.  
5  
6

### 7 Future research

8  
9 Future research could examine the mechanisms by which mortality outcomes may differ  
10  
11 between MALDI-TOF and conventional diagnosis. Analysis of length of stay and survival in  
12  
13 observational study designs in US contexts by Huang et al<sup>20</sup> and Perez et al <sup>21</sup> found beneficial  
14  
15 effects of MALDI-TOF when used in conjunction with antimicrobial stewardship programmes,  
16  
17 hinting at organisational changes that may be needed to exploit the faster identification offered  
18  
19 by MALDI-TOF <sup>22</sup> . However, this is context-specific, as in other health systems, such as the  
20  
21 NHS in which the present trial was conducted, bacteraemia consultation teams are routine and  
22  
23 involved in care at an early stage.  
24  
25

### 26 **Conclusion**

27  
28 Overall, the evidence from the RAPIDO trial suggests that the use of MALDI-TOF as an adjunct  
29  
30 to conventional microbial identification is unlikely to offer value when its incremental costs are  
31  
32 compared to 28-day incremental survival. It is plausible that the costs of MALDI-TOF in “real-  
33  
34 world” routine use may well be lower than those measured during the RAPIDO trial, and savings  
35  
36 can also be expected as it would displace much conventional testing.  
37  
38  
39  
40  
41  
42  
43  
44  
45  
46  
47  
48  
49  
50  
51  
52  
53  
54  
55  
56  
57  
58  
59  
60



1  
2  
3  
4  
5 **Contributorship statement:** PD and WH: conducted the economic analysis. PD wrote the first  
6 draft of this manuscript. PD, WH, KP, RR, MS, AMG: Reviewed, commented and edited the  
7 manuscript. AMG: Chief investigator for the RAPIDO trial.  
8  
9

10  
11  
12 **Data statement:** Permission to share individual-level data was not obtained from trial  
13 participants. Requests for summary level data should be directed to AMG.  
14  
15

16  
17 **Funding statement:** This report summarises independent research funded by the National  
18 Institute for Health Research (NIHR) under its Programme Grant for Applied Research (PGfAR  
19 RP-PG-0707-10043). The views and opinions expressed in this report are those of the authors  
20 and do not necessarily reflect those of the National Institute for Health Research (NIHR), the  
21 NHS or the Department of Health. The funder had no role in the conduct of the study, the writing  
22 of the manuscript or the decision to submit it for publication.  
23  
24  
25  
26  
27  
28

29  
30 **Acknowledgements:** We are very grateful to all patients, health care professionals, and NHS  
31 staff who contributed time and effort to make the RAPIDO trial possible. We are grateful to  
32 administrative staff at trial sites for support with participant recruitment, data entry and trial  
33 administration. The RAPIDO trial was designed and delivered in collaboration with Clinical Trials  
34 and Evaluation Unit Bristol (CTEU), a UKCRC Registered Clinical Trials Unit in receipt of  
35 National Institute for Health Research CTU support funding. RR acknowledges support from the  
36 NIHR Health Protection Research Unit in Behavioural Science and Evaluation at University of  
37 Bristol.  
38  
39  
40  
41  
42  
43  
44  
45  
46

47  
48 **Competing interests statement:** The authors declare no conflicts of interest.  
49

50  
51 **Ethics:** The RAPIDO trial was approved by the NRES Committee South West - Frenchay on 20  
52 March 2012, reference 12/SW/003.  
53

54  
55 **Informed consent:** In order to initiate rapid diagnosis quickly, the study design required prompt  
56 randomisation when blood cultures flagged positive, so it was necessary to seek consent  
57  
58  
59  
60

1  
2  
3  
4  
5  
6  
7  
8  
9  
10  
11  
12  
13  
14  
15  
16  
17  
18  
19  
20  
21  
22  
23  
24  
25  
26  
27  
28  
29  
30  
31  
32  
33  
34  
35  
36  
37  
38  
39  
40  
41  
42  
43  
44  
45  
46  
47  
48  
49  
50  
51  
52  
53  
54  
55  
56  
57  
58  
59  
60

retrospectively. Further details are provided in the main text and in references to the main trial publication.

For peer review only

## References

1. Goto M, Al-Hasan MN. Overall burden of bloodstream infection and nosocomial bloodstream infection in North America and Europe. *Clin Microbiol Infect* 2013;19(6):501-09. doi: 10.1111/1469-0691.12195
2. MacGowan A, Grier S, Stoddart M, et al. Impact of rapid microbial identification on clinical outcomes in bloodstream infection: the RAPIDO randomised trial. *Clin Microbiol Infect* 2020 doi: <https://doi.org/10.1016/j.cmi.2020.01.030>
3. Timbrook TT, Morton JB, McConeghy KW, et al. The Effect of Molecular Rapid Diagnostic Testing on Clinical Outcomes in Bloodstream Infections: A Systematic Review and Meta-analysis. *Clinical infectious diseases : an official publication of the Infectious Diseases Society of America* 2017;64(1):15-23. doi: 10.1093/cid/ciw649 [published Online First: 2016/11/03]
4. Albur MS, Bowker K, Weir I, et al. Factors influencing the clinical outcome of methicillin-resistant *Staphylococcus aureus* bacteraemia. *European journal of clinical microbiology & infectious diseases : official publication of the European Society of Clinical Microbiology* 2012;31(3):295-301. doi: 10.1007/s10096-011-1310-2 [published Online First: 2011/06/15]
5. Laupland KB, Gregson DB, Church DL, et al. Incidence, risk factors and outcomes of *Escherichia coli* bloodstream infections in a large Canadian region. *Clinical microbiology and infection : the official publication of the European Society of Clinical Microbiology and Infectious Diseases* 2008;14(11):1041-7. doi: 10.1111/j.1469-0691.2008.02089.x [published Online First: 2008/12/02]
6. van Hal SJ, Jensen SO, Vaska VL, et al. Predictors of mortality in *Staphylococcus aureus* Bacteremia. *Clinical microbiology reviews* 2012;25(2):362-86. doi: 10.1128/cmr.05022-11 [published Online First: 2012/04/12]
7. Seifert H. The Clinical Importance of Microbiological Findings in the Diagnosis and Management of Bloodstream Infections. *Clin Infect Dis* 2009;48(Supplement 4):S238-S45. doi: <http://dx.doi.org/10.1086/598188>
8. Evans RN, Pike K, Rogers CA, et al. Modifiable healthcare factors affecting 28-day survival in bloodstream infection: a prospective cohort study. *BMC Infect Dis* 2020;20(1):545. doi: 10.1186/s12879-020-05262-6
9. Fournier P-E, Drancourt M, Colson P, et al. Modern clinical microbiology: new challenges and solutions. *Nature Reviews Microbiology* 2013;11(8):574-85. doi: <http://dx.doi.org/10.1038/nrmicro3068>
10. Curtis L, Burns A. Unit Costs of Health and Social Care 2019. Personal Social Services Research Unit. University of Kent, Canterbury, 2018.
11. Department of Health. Reference Costs 2012/13. London, 2013.
12. Joint Formulary Committee. British National Formulary (BNF): Pharmaceutical Press, 2012.
13. White IR, Royston P, Wood AM. Multiple imputation using chained equations: Issues and guidance for practice. *Stat Med* 2011;30(4):377-99. doi: 10.1002/sim.4067
14. Royston P, White IR. Multiple Imputation by Chained Equations (MICE): Implementation in Stata. *Journal of Statistical Software* 2011;45:1-20.
15. Faria R, Gomes M, Epstein D, et al. A Guide to Handling Missing Data in Cost-Effectiveness Analysis Conducted Within Randomised Controlled Trials. *Pharmacoeconomics* 2014;32(12):1157-70. doi: 10.1007/s40273-014-0193-3
16. Willan AR, Briggs AH, Hoch JS. Regression methods for covariate adjustment and subgroup analysis for non-censored cost-effectiveness data. *Health Econ* 2004;13(5):461-75. doi: 10.1002/heec.843

- 1
- 2
- 3 17. Bearman GML, Wenzel RP. Bacteremias: A Leading Cause of Death. *Arch Med Res*
- 4 2005;36(6):646-59. doi: <http://dx.doi.org/10.1016/j.arcmed.2005.02.005>
- 5
- 6 18. Kilgore M, Brossette S. Cost of bloodstream infections. *Am J Infect Control* 2008;36(10):S172.e1-
- 7 S72.e3.
- 8 19. Dixon P, Davies P, Hollingworth W, et al. A systematic review of matrix-assisted laser
- 9 desorption/ionisation time-of-flight mass spectrometry compared to routine microbiological
- 10 methods for the time taken to identify microbial organisms from positive blood cultures. *Eur*
- 11 *J Clin Microbiol Infect Dis* 2015;34(5):863-76. doi: 10.1007/s10096-015-2322-0
- 12
- 13 20. Huang AM, Newton D, Kunapuli A, et al. Impact of Rapid Organism Identification via Matrix-
- 14 Assisted Laser Desorption/Ionization Time-of-Flight Combined With Antimicrobial
- 15 Stewardship Team Intervention in Adult Patients With Bacteremia and Candidemia. *Clin*
- 16 *Infect Dis* 2013;57(9):1237-45. doi: <http://dx.doi.org/10.1093/cid/cit498>
- 17
- 18 21. Perez KK, Olsen RJ, Musick WL, et al. Integrating Rapid Pathogen Identification and Antimicrobial
- 19 Stewardship Significantly Decreases Hospital Costs. *Arch Pathol Lab Med* 2012;137(9):1247-
- 20 54. doi: <http://dx.doi.org/10.5858/arpa.2012-0651-OA>
- 21
- 22 22. Kothari A, Morgan M, Haake D. Emerging Technologies for Rapid Identification of Bloodstream
- 23 Pathogens. *Clin Infect Dis* 2014
- 24
- 25
- 26
- 27
- 28
- 29
- 30
- 31
- 32
- 33
- 34
- 35
- 36
- 37
- 38
- 39
- 40
- 41
- 42
- 43
- 44
- 45
- 46
- 47
- 48
- 49
- 50
- 51
- 52
- 53
- 54
- 55
- 56
- 57
- 58
- 59
- 60

1  
2  
3  
4  
5  
6  
7  
8  
9  
10  
11  
12  
13  
14  
15  
16  
17  
18  
19  
20  
21  
22  
23  
24  
25  
26  
27  
28  
29  
30  
31  
32  
33  
34  
35  
36  
37  
38  
39  
40  
41  
42  
43  
44  
45  
46  
47  
48  
49  
50  
51  
52  
53  
54  
55  
56  
57  
58  
59  
60

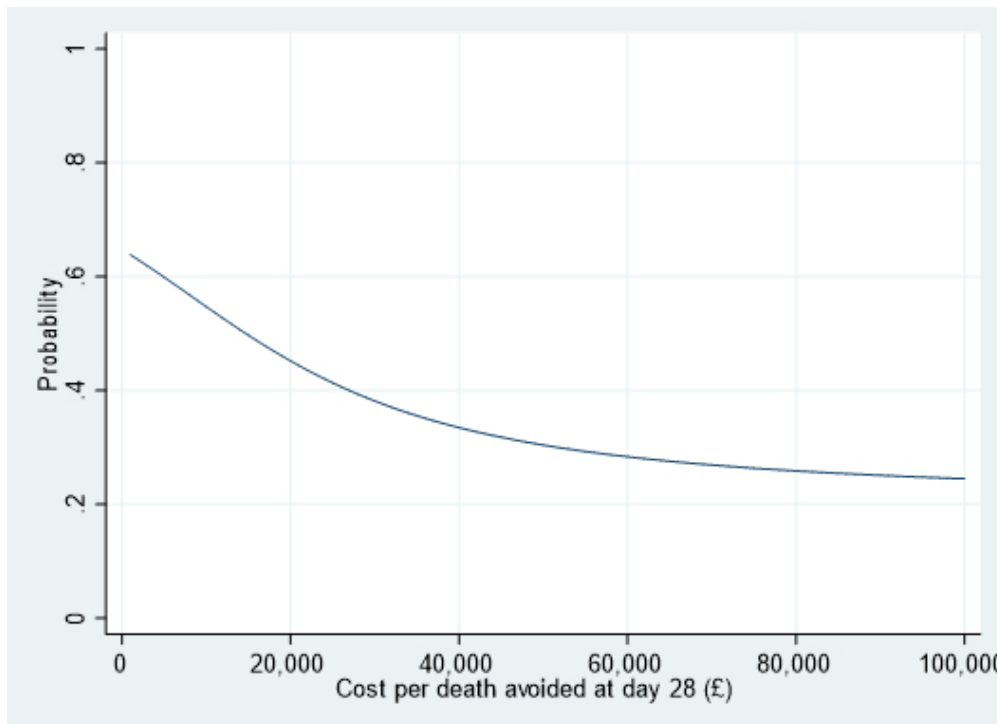

Cost-effectiveness acceptability curve for base case

## **SUPPLEMENTARY MATERIAL - Cost-effectiveness of rapid laboratory-based mass-spectrometry diagnosis of bloodstream infection: Evidence from the RAPIDO randomized controlled trial**

### **Costing of hospital stays**

The cost of ward stays was calculated from the 2012/13 NHS Reference Costs (1) and then inflated using Curtis and Burns (2) as described in main text.

### Costing by ward speciality

Hospital admission was an inclusion criterion for the RAPIDO trial, but a small number of “non-admitted” ward-days could occur in cases where the diagnostic blood sample was taken in an outpatient or day-case setting shortly before admission to a more appropriate speciality. Therefore, all ward stays were costed as inpatients unless the ward speciality recorded in the dataset explicitly specified otherwise e.g. day-case surgery.

The ward specialities described in the dataset were mapped to their nearest equivalent Service Descriptions and currency codes in NHS Reference Costs as shown in Table A1. Where more than one Service Description or currency code applied to a ward speciality, the ward cost was calculated as an average of the unit costs of each Service Description or currency code, weighted by the number of bed-days reported for them in NHS Reference Costs. An example calculation is shown in Table A2.

The RAPIDO dataset did not include the number of organs supported in critical care so the cost of stays in high-dependency units (HDUs) and intensive therapy units (ITUs) was also calculated as a weighted average. The costs of a bed-day on an adult critical care unit for the different levels of organ support are listed in NHS Reference Costs; these costs were weighted by the number of bed-days reported for patients at each level of support to give an average cost for use in analysis.

Table A1 Matching of RAPIDO ward specialities to NHS Reference Cost categories

| RAPIDO ward speciality description                                                | NHS Reference Cost 'Service Description'       | NHS Reference Cost 'service code' or 'currency description' <sup>a,b</sup> |
|-----------------------------------------------------------------------------------|------------------------------------------------|----------------------------------------------------------------------------|
| Medical: Acute medical admissions and pre-admissions                              | Accident and Emergency                         | Admitted codes only <sup>c</sup>                                           |
| Medical: Cardiology / cardiovascular / coronary                                   | Cardiology                                     | 320                                                                        |
| Medical: Care of the Elderly                                                      | Geriatric Medicine                             | 430                                                                        |
| Medical: Dermatology / rheumatology                                               | Dermatology AND<br>Rheumatology                | 410[R] AND 330[D]                                                          |
| Medical: Diabetes / endocrinology                                                 | Diabetic Medicine AND<br>Endocrinology         | 307[D] AND 302[E]                                                          |
| Medical: Gastroenterology / gastrology / liver                                    | Gastroenterology AND<br>Hepatology             | 301 [G] and 306[H]                                                         |
| Medical: General medical (no declared speciality)                                 | General Medicine                               | 300                                                                        |
| Medical: Haematology / oncology                                                   | Clinical haematology AND<br>Clinical oncology  | 303[H] and 800[O]                                                          |
| Medical: Infectious disease / travel medicine                                     | Infectious Diseases                            | 350                                                                        |
| Medical: Nephrology / renal / dialysis                                            | Nephrology                                     | 361                                                                        |
| Medical: Neurology / neurosciences / neuromedical                                 | Neurology                                      | 400                                                                        |
| Medical: Palliative                                                               | Palliative Medicine                            | 315                                                                        |
| Medical: Respiratory                                                              | Respiratory Medicine                           | 328                                                                        |
| Medical: Stroke                                                                   | Stroke Medicine                                | 340                                                                        |
| ITU/HDU <sup>d</sup> : General (not specified as surgical, medical or specialist) | Adult Critical Care Unit                       | Critical care currencies                                                   |
| ITU/HDU: General medical                                                          | N/A <sup>e</sup>                               | N/A                                                                        |
| ITU/HDU: General surgical                                                         | Adult Critical Care Unit                       | Critical care currencies                                                   |
| ITU/HDU: Cardiac                                                                  | Adult Critical Care Unit                       | Critical care currencies                                                   |
| ITU/HDU: Neurology/neurosurgery                                                   | Adult Critical Care Unit                       | Critical care currencies                                                   |
| ITU/HDU: Renal                                                                    | N/A                                            | N/A                                                                        |
| ITU/HDU: Theatre recovery areas                                                   | N/A                                            | N/A                                                                        |
| Surgery: Admissions / pre-admissions units                                        | General surgery                                | 100                                                                        |
| Surgery: Cardiothoracic / thoracic                                                | Cardiothoracic surgery AND<br>Thoracic surgery | 170[C] and 173[T]                                                          |
| Surgery: Ear, nose, throat, oral & maxillo-facial, and ophthalmic units           | All surgical codes <sup>f</sup>                | Inpatient codes only <sup>c</sup>                                          |
| Surgery: General including GI, breast, vascular                                   | General surgery                                | 100                                                                        |

|                                                                              |                                            |                                   |
|------------------------------------------------------------------------------|--------------------------------------------|-----------------------------------|
| Surgery: Neurosurgery                                                        | Neurosurgery                               | 150                               |
| Surgery: Orthopaedic / trauma                                                | Trauma & Orthopaedics                      | 110                               |
| Surgery: Plastics / burns                                                    | Plastic surgery                            | 160                               |
| Surgery: Short stay and daycase units                                        | General surgery                            | 100, day cases only               |
| Surgery: Urology / renal                                                     | All surgical codes <sup>f</sup>            | Inpatient codes only <sup>c</sup> |
| Other: A&E, emergency assessment, fracture clinics and related units         | Accident and Emergency                     | Admitted codes only <sup>c</sup>  |
| Other: Imaging, diagnostics and telemetry                                    | N/A                                        | N/A                               |
| Other: Obstetrics & gynaecology                                              | Obstetrics                                 | 501                               |
| Other: Psychology / psychiatry / mental health                               | N/A                                        | N/A                               |
| Other: Services - not medical, surgical or HDU/ITU, and not listed elsewhere | "Other Procedures or Health Care Problems" | Inpatient codes only <sup>c</sup> |

**Notes to Table A1:**

<sup>a</sup> If there were separate codes for adults and children, only adult codes were used.

<sup>b</sup> If multiple NHS Service Descriptions or Currency Codes applied, costs were weighted by the number of bed-days occupancy for each Description or Code (or, in critical care, number of organs supported) reported in NHS Reference Costs.

<sup>c</sup> Only 'Inpatient' or 'Admitted' codes were used in these cases as all RAPIDO patients were admitted before or soon after taking of the diagnostic blood sample.

<sup>d</sup> HDU/ITU = critical care specialities (high dependency and intensive therapy units), costs weighted by number of bed-days occupancy for each number of organs supported in critical care.

<sup>e</sup> N/A = Not applicable – not costed as no observations in the trial.

<sup>f</sup> A weighted average across all admitted surgical codes was used for surgical specialities that were not listed specifically in NHS Reference Costs. Costing by length of stay

Hospitals in the NHS are paid according to patients' length of stay, with different levels of payment being made according to whether each bed-day of the stay is an 'inlier' bed-day or an excess (or 'outlier') bed-day. These payments constitute 'costs' from an NHS system perspective and we used them to cost hospital stays.

The total costs of the patients' stays in each arm of the trial depend on their whole ward history from the date of admission, not from the date of randomisation - although, clearly, differences due to the RAPIDO intervention could only accrue after randomisation. The total hospital cost could not be calculated because, although the date of admission was known, it was not known for how long patients had been on particular wards before the diagnostic blood samples were taken.

The distinction between an inlier bed-day and an excess bed-day is defined by reference to a trim point, a figure which is intended to capture the upper end of the range of lengths of stay expected for a given currency code. It is calculated as the (upper quartile of length of stay) + 1.5 × (interquartile range of length of stay). In a long stay, days after the trim point are counted as excess bed-days, while days up to the trim point are counted as inliers.

For inlier costs, national average unit costs and average length of stay (number of days) per Finished Consultant Episode are reported. A Finished Consultant Episode is a completed episode of treatment



received by a patient under the care of one consultant. Dividing the mean nationwide unit cost for a given currency code by the mean nationwide number of inpatient days for a patient admitted under that currency code gives its estimated per-day cost. To obtain the weighted cost for each currency code, we multiply the per-day cost by the share of that currency code in the total bed-days of all currency codes in each Service Description. The sum of these figures is the weighted average per-day cost for either elective inpatient or non-elective inpatients receiving treatment under that Service Description. Unit costs per excess bed day are calculated in a similar manner.

### Elective and non-elective stays

The RAPIDO dataset did not include information to classify each day of each patient's stay in a ward as elective or non-elective. It is likely that a high proportion of ward admittances after day 0 of the trial were non-elective since they followed a presumed diagnosis (or, at least, clear suspicion) of bloodstream infection, as evidenced by the taking of a blood sample for culture. However, it is possible that the infection developed during an elective admission, so ward costs – particularly on day 0 – might in fact be charged as elective. We therefore included both elective and non-elective costs in our calculations, by weighting the average cost of all currency codes in each category (elective and non-elective) by their respective shares in bed-days.

A post hoc analysis examined the sensitivity of unit costs to the exclusion of elective care. The effect on unit costs of this exclusion was modest. In some cases, unit costs do not distinguish between elective and non-elective (e.g. for critical care) and the exclusion had no effect, and in other cases the effect of excluding elective admissions was to reduce unit costs by approximately 0.1% to 1%. We consider that including elective care in the calculation of unit costs in general is a conservative approach, and one appropriate to our base-case analysis. We therefore did not re-run this analysis using the very slightly lower unit costs that would have arisen under the exclusion of elective care.

### Example: calculation of per-day cost for a 'General Medical' ward stay

The steps involved in the calculation of unit costs for the 'General Medicine' Service Description are set out in Table A2.

Table A2 Example calculation of weighted per-day cost associated with the 'General Medicine' Service Description in 2012/13

| Item                                         | Quantity or share of total | Calculation |
|----------------------------------------------|----------------------------|-------------|
| <i>Number of bed-days<sup>a</sup></i>        |                            |             |
| National total bed-days per year:            |                            |             |
| Elective Inpatient excluding short-stay (EI) | 96,339                     | A           |
| National total bed-days per year:            |                            |             |
| Non-Elective Inpatient (NEI)                 | 6,398,877                  | B           |
| National total bed-days per year:            |                            |             |
| Non-Elective Inpatient Short-stay (NEI-S)    | 1,545,596                  | C           |
| National total bed-days per year:            |                            |             |
| Inpatients (EI + NEI + NEI-S)                | 8,040,812                  | D=(A+B+C)   |
| <i>Share of bed-days</i>                     |                            |             |

|                                                                                                                 |         |                |
|-----------------------------------------------------------------------------------------------------------------|---------|----------------|
| % of days that relate to EI                                                                                     | 1.20%   | $E=A/D$        |
| % of days that relate to NEI                                                                                    | 79.58%  | $F=B/D$        |
| % of days that relate to NEI-S                                                                                  | 19.22%  | $G=C/D$        |
| <i>Averaging over inlier/outlier bed-days and currency codes</i>                                                |         |                |
| Weighted <sup>b</sup> average per-day cost: EI                                                                  | £456.18 | $H^b$          |
| Weighted <sup>b</sup> average per-day cost: NEI                                                                 | £327.48 | $I^b$          |
| Weighted <sup>b</sup> average per-day cost: NEI-S                                                               | £434.19 | $J^b$          |
| <i>Contributions of elective, non-elective and short stays</i>                                                  |         |                |
| Weighted <sup>c</sup> EI cost per day                                                                           | £5.47   | $K=H \times E$ |
| Weighted <sup>c</sup> NEI cost per day                                                                          | £260.61 | $L=F \times I$ |
| Weighted <sup>c</sup> NEI-S cost per                                                                            | £83.46  | $M=G \times J$ |
| <i>Estimated mean cost per day for RAPIDO analysis</i>                                                          |         |                |
| Cost of a General Medical ward-day for RAPIDO analysis i.e. weighted average of EI, NEI and NEI-S per day costs | £349.53 | $K+L+M$        |

<sup>a</sup>'Bed-days' here captures both bed days and excess bed days. <sup>b</sup>These figures are calculated as the average of bed-day-weighted sum of costs for inlier bed-days and excess bed-days across all currency codes within the 'General Medicine' service description, weighted by proportion of bed-days from each currency code, as described in the text. <sup>c</sup>These figures are weighted by the proportion of bed-days from each type of inpatient stay (elective, non-elective, and non-elective short-stay).

## Costing of MALDI-TOF spectrometry

Data from published literature and confidential information provided by one study centre was used to estimate a mean per blood-sample cost of diagnosis using MALDI-TOF technology at 2012/13 prices and then subsequently inflated.

At this centre, 4,303 machine-positive adult blood samples were recorded during the whole study period, equating to 2,061 per year. In routine use of the technology, all of these would have been tested by MALDI-TOF but fewer were actually tested during the RAPIDO trial. Only 3,153 flagged positive during study hours (=1510/year) and, with 1:1 randomisation, only approximately half of those (755) would have been allocated to MALDI-TOF diagnosis.

We estimated the proportion of total MALDI-TOF cost attributable to use for positive blood cultures as 12% based on two considerations. First, approximately 10-15% of all microbiology laboratory requests for 'culture and sensitivity' related to blood samples. Second, at this centre, organisms from blood accounted for approximately 12% of all organisms identified.

We used these figures to calculate the capital, operating, labour and consumable costs used per positive sample as set out in Table A3. Salary costs and information concerning on costs and overheads were taken from Curtis (2013).(3)

Table A3 Calculation of unit cost of MALDI-TOF identification in 2012/13 prices

| Item                                                                 | Mean value   | Comment / data source                                                                                                  |
|----------------------------------------------------------------------|--------------|------------------------------------------------------------------------------------------------------------------------|
| <i>Capital-related costs</i>                                         |              |                                                                                                                        |
| Capital cost for new MALDI-TOF machine                               | £130,000     | Published literature, catalogue prices, confidential information from one study centre                                 |
| Economic life used for depreciation calculations                     | 10 years     | Published literature, catalogue prices, confidential information from one study centre                                 |
| Annual capital charge per blood sample                               | £0.76        |                                                                                                                        |
| <i>Maintenance costs</i>                                             |              |                                                                                                                        |
| Annual non-reagent maintenance contract (13% of capital cost)        | £16,900      | Published literature, confidential information from one study centre                                                   |
| Maintenance cost per blood sample                                    | £0.98        |                                                                                                                        |
| <i>Consumable costs</i>                                              |              |                                                                                                                        |
| Consumables cost per blood sample, as used in RAPIDO protocol        | £0.17        | Trial protocol, catalogue data, information from one study centre                                                      |
| <i>Labour costs, including on-costs and overheads</i>                |              |                                                                                                                        |
| Band 5 salary                                                        | £62,927      | Staff grades at one study centre, published NHS paycales, Curtis (2013) for information on oncosts and overhead        |
| Band 6 salary                                                        | £76,569      | Staff grades at one study centre; published NHS paycales; information on on-costs and overheads from Curtis (2013).(3) |
| Labour cost per sample                                               | £4.17        | ...assuming that each grade contributes equally to processing of all blood samples                                     |
| <i>Total cost</i>                                                    |              |                                                                                                                        |
| Total cost per machine-positive blood sample analysed with MALDI-TOF | <u>£6.08</u> |                                                                                                                        |

## CONSORT diagram of patient numbers

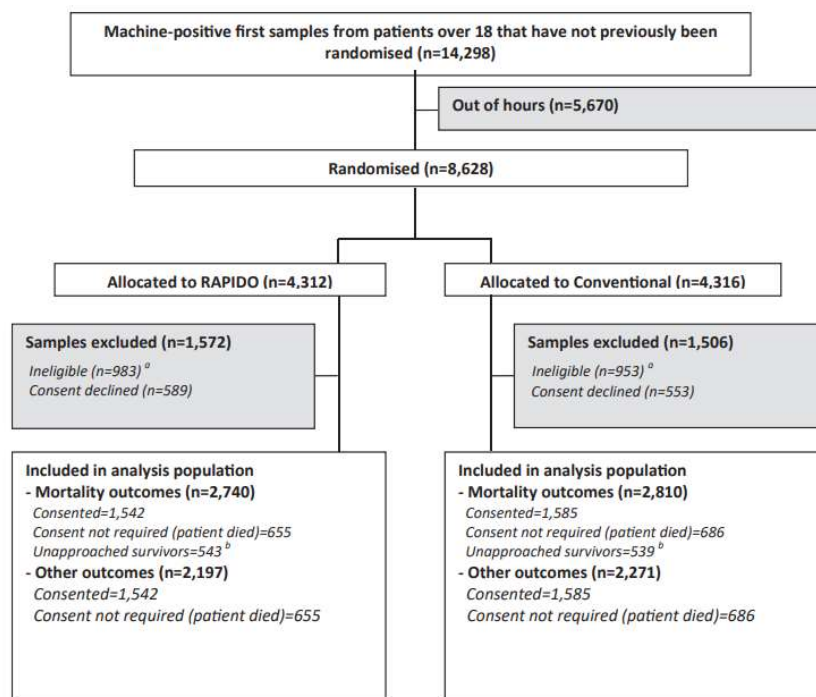

Notes to figure: Flow of patients. a Ineligible samples include 111 rapid diagnosis and 125 conventional samples that were randomized in error, and 872 rapid diagnosis and 828 conventional that were randomized correctly but met postrandomization exclusion criteria. b Unapproached survivors are eligible patients who could not be approached for consent, usually because of lack of capacity and inability to identify a consultee. They are included in mortality analysis (only) as 28-day survivors.

## Costs and results in 2012/13 price levels

Table A4 Costs in available cases

| Mean cost           | Control<br>(N=2,271) | RAPIDO<br>(N=2,197) | Difference (95% CI) <sup>a</sup> |                 |
|---------------------|----------------------|---------------------|----------------------------------|-----------------|
| Intervention cost   | -                    | £6                  | +£6                              |                 |
| Antimicrobial cost  | £247                 | £265                | +£18                             | (-£6 to £41)    |
| 7-day ward costs    | £3,448               | £3,404              | -£44                             | (-£165 to £77)  |
| Total 7-day costs   | £3,695               | £3,675              | -£20                             | (-£148 to £108) |
| 28-day ward costs   | £8,451               | £8,412              | -£39                             | (-£505 to £427) |
| Total 28-days costs | £8,698               | £8,682              | -£15                             | (-£487 to £456) |

**Note:** <sup>a</sup> Confidence intervals around mean differences calculated from unadjusted linear regression

### Cost-effectiveness and sensitivity analysis

In the base-case imputed analysis, estimated mean costs per patient were lower in the RAPIDO arm (mean difference -£114; 95% CI:-£710 to £482), and the proportion of patients alive at day 28 was also lower (81.4% vs 82.3%, see Table A5). Ward costs, including the costs of conventional microbiological testing, constituted 97% of total costs in each arm. Most of the remaining 3% of total cost was attributable to antimicrobial costs. The estimated per-patient cost of diagnosis using MALDI-TOF (£6.08) constituted a negligible proportion of overall per-patient mean costs in the intervention arm.

Table A5 Costs and outcome: base-case analysis with imputation (N=5,550)

|                              | Control | RAPIDO | Difference (95% CI) |                   |
|------------------------------|---------|--------|---------------------|-------------------|
| Mean 28-day NHS costs        | £ 7,485 | £7,371 | -£114               | (-£710 to £482)   |
| 28-day survival <sup>a</sup> | 0.823   | 0.814  | -0.009              | (-0.029 to 0.011) |

**Note:** <sup>a</sup>Survival measured as the proportion of patients alive at day 28.

Table A6 Cost-effectiveness: base-case analysis with imputation (N=5,550)

| Threshold <sup>a</sup> | Net monetary benefit (95% CI) | Probability of cost-effectiveness |
|------------------------|-------------------------------|-----------------------------------|
| £5,000                 | £71 (-£519 to £661)           | 0.59                              |
| £10,000                | £28 (-£579 to £636)           | 0.54                              |
| £20,000                | -£57 (-£745 to £630)          | 0.44                              |
| £30,000                | -£143 (-£954 to £668)         | 0.36                              |
| £50,000                | -£315 (-£1,443 to £814)       | 0.29                              |

**Note:** <sup>a</sup>Threshold value = 28-day cost per death avoided at 28 days.

The probability of the RAPIDO intervention being cost-effective declines with increasing threshold values of cost per death avoided at 28 days, as shown in Figure A1.

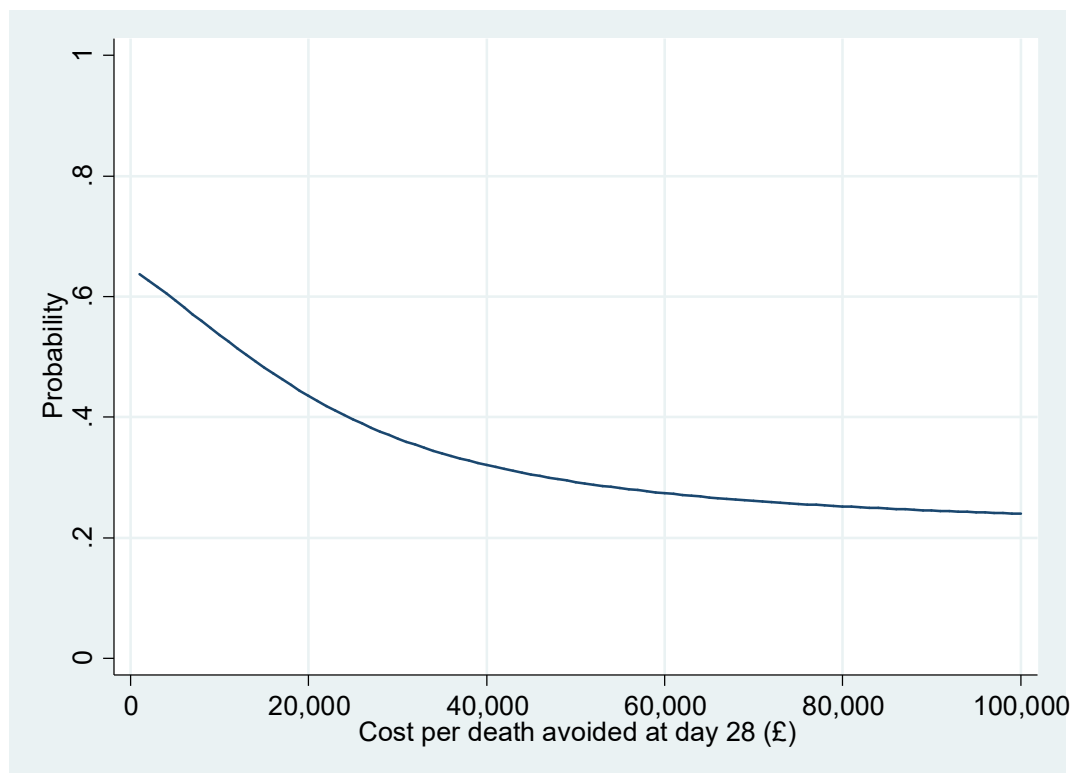

Figure A1 Cost-effectiveness acceptability curve for base case

Table A7 and A8 report the results of the various sensitivity analyses. These analyses, expressed as net monetary benefit (with associated 95% confidence intervals), do not differ substantially from the base-case results. Estimating costs at seven rather than 28 days did not alter the overall cost-effectiveness conclusions.

### Subgroup analysis

Table A9 and Table A10 present the results of the subgroup analysis comparing clinically significant and clinically non-significant episodes of bloodstream infection. Statistical tests for interaction showed no evidence of a subgroup effect (p-value for interaction in the cost seemingly unrelated regression equation=0.32, p-value in the outcome seemingly unrelated regression equation =0.66), and estimates of difference between Conventional and RAPIDO diagnosis in both outcome and costs were broadly similar for the clinically significant and clinically non-significant subgroups.

Table A7 Sensitivity analysis: costs and outcome

|                                  |            | Excluding unapproached survivors,<br>N=4,468, cost at 28 days |                    | Excluding unapproached survivors,<br>N=4,468, cost at 7 days |                    | Including unapproached survivors,<br>N=5,550, cost at 7 days |                    |
|----------------------------------|------------|---------------------------------------------------------------|--------------------|--------------------------------------------------------------|--------------------|--------------------------------------------------------------|--------------------|
| NHS costs<br>mean (95% CI)       | Control    | £8,705                                                        | (£8,376 to £9,033) | £3,697                                                       | (£3,608 to £3,786) | £3,324                                                       | (£3,098 to £3,598) |
|                                  | RAPIDO     | £8,675                                                        | (£8,341 to £9,009) | £3,673                                                       | (£3,583 to £3,763) | £3,238                                                       | (£3,094 to £3,619) |
|                                  | Difference | -£30                                                          | (-£498 to £439)    | -£24                                                         | (-£151 to £103)    | -£86                                                         | (-£324 to £153)    |
| 28-day survival<br>mean (95% CI) | Control    | 0.78                                                          | (0.76 to 0.80)     | 0.78                                                         | (0.76 to 0.80)     | 0.82                                                         | (0.81 to 0.84)     |
|                                  | RAPIDO     | 0.77                                                          | (0.75 to 0.79)     | 0.77                                                         | (0.75 to 0.79)     | 0.81                                                         | (.80 to 0.83)      |
|                                  | Difference | -0.01                                                         | (-0.04 to 0.01)    | -0.01                                                        | (-0.04 to -0.01)   | -0.01                                                        | (-0.03 to 0.01)    |

Table A8 Sensitivity analysis: cost effectiveness

| Threshold <sup>a</sup> | Excluding unapproached survivors, N=4,468, cost<br>at 28 days |                   |                  | Excluding unapproached survivors,<br>N=4,468, cost at 7 days |                   |      | Including unapproached survivors, N=5,550, cost at<br>7 days |                   |      |
|------------------------|---------------------------------------------------------------|-------------------|------------------|--------------------------------------------------------------|-------------------|------|--------------------------------------------------------------|-------------------|------|
|                        | NMB                                                           | (95% CI)          | PCE <sup>b</sup> | NMB                                                          | (95% CI)          | PCE  | NMB                                                          | (95% CI)          | PCE  |
| £50,000                | -£32                                                          | (-£489 to £425)   | 0.45             | -£38                                                         | (-£199 to £124)   | 0.32 | £43                                                          | (-£209 to £295)   | 0.63 |
| £10,000                | -£94                                                          | (-£572 to £385)   | 0.35             | -£99                                                         | (-£356 to £158)   | 0.23 | £0                                                           | (-£305 to -£305)  | 0.50 |
| £20,000                | -£217                                                         | (-£814 to £381)   | 0.24             | -£222                                                        | (-£707 to £263)   | 0.18 | -£86                                                         | (-£548 to £377)   | 0.36 |
| £30,000                | -£340                                                         | (-£1,117 to £438) | 0.20             | -£345                                                        | (-£1,069 to £379) | 0.17 | -£171                                                        | (-£817 to £474)   | 0.30 |
| £50,000                | -£586                                                         | (-£1,793 to £622) | 0.17             | -£591                                                        | (-£1,799 to £616) | 0.17 | -£343                                                        | (-£1,376 to £691) | 0.26 |

**Notes:** <sup>a</sup>Threshold value = cost per death avoided at 28 days; <sup>b</sup>NMB = net monetary benefit [mean (95% confidence interval)]; <sup>c</sup>PCE = probability of cost-effectiveness at given threshold.

Table A9 Subgroup analysis: costs and outcome

|                                   |            | All (unapproached survivors excluded)<br>N=4,468 |                    | Clinically significant episodes only<br>N=3,010 (67%) |                    | Clinically non-significant episodes only<br>N=1,458 (33%) |                    |
|-----------------------------------|------------|--------------------------------------------------|--------------------|-------------------------------------------------------|--------------------|-----------------------------------------------------------|--------------------|
| 28-day NHS costs<br>mean (95% CI) | Control    | £8,705                                           | (£8,376 to £9,033) | £8,570                                                | (£8,148 to £8,992) | £8,565                                                    | (£7,962 to £9,168) |
|                                   | RAPIDO     | £8,675                                           | (£8,341 to £9,009) | £8,716                                                | (£8,278 to £9,155) | £8,199                                                    | (£7,611 to £8,787) |
|                                   | Difference | -£30                                             | (-£498 to £439)    | £146                                                  | (-£425 to £717)    | -£365                                                     | (-£1,186 to £454)  |
| 28-day survival<br>mean (95% CI)  | Control    | 0.78                                             | (0.76 to 0.80)     | 0.78                                                  | (0.76 to 0.79)     | 0.80                                                      | (0.77 to 0.83)     |
|                                   | RAPIDO     | 0.77                                             | (0.75 to 0.79)     | 0.77                                                  | (0.75 to 0.79)     | 0.78                                                      | (0.75 to 0.81)     |
|                                   | Difference | -0.01                                            | (-0.04 to 0.01)    | -0.01                                                 | (-0.04 to 0.02)    | -0.02                                                     | (-0.06 to 0.02)    |

Table A10 Subgroup analysis: cost effectiveness at 28 days

| Threshold<br>value <sup>a</sup> | All (unapproached survivors excluded) N=4,468 |                   |                  | Clinically significant episodes only N=3,010 (67%) |                     |      | Clinically non-significant episodes only N=1,458<br>(33%) |                     |      |
|---------------------------------|-----------------------------------------------|-------------------|------------------|----------------------------------------------------|---------------------|------|-----------------------------------------------------------|---------------------|------|
|                                 | NMB <sup>b</sup>                              | (95% CI)          | PCE <sup>c</sup> | NMB                                                | (95% CI)            | PCE  | NMB                                                       | (95% CI)            | PCE  |
| £50,000                         | -£32                                          | (-£489 to £425)   | 0.45             | -£191                                              | (-£780 to £390)     | 0.26 | £263                                                      | (-£585 to £1,110)   | 0.73 |
| £10,000                         | -£94                                          | (-£572 to £385)   | 0.35             | -£235                                              | (-£879 to £409)     | 0.24 | £160                                                      | (£765 to £1,085)    | 0.63 |
| £20,000                         | -£217                                         | (-£814 to £381)   | 0.24             | -£324                                              | (-£1,149 to £501)   | 0.22 | -£47                                                      | (-£1,231 to £1,138) | 0.47 |
| £30,000                         | -£340                                         | (-£1,117 to £438) | 0.20             | -£413                                              | (-£1,472 to £647)   | 0.22 | -£253                                                     | (-£276 to -£230)    | 0.37 |
| £50,000                         | -£586                                         | (-£1,793 to £622) | 0.17             | -£591                                              | (-£2,814 to £1,003) | 0.23 | -£665                                                     | (-£700 to -£631)    | 0.28 |

<sup>a</sup>Threshold value = cost per death avoided at 28 days; <sup>b</sup>NMB = net monetary benefit [mean (95% confidence interval)]; <sup>c</sup>PCE = probability of cost-effectiveness at given threshold.

## References



1. **Department of Health** (2013) Reference Costs 2012/13. London.
2. **Curtis L & Burns A** (2018) Unit Costs of Health and Social Care 2019. Personal Social Services Research Unit. University of Kent, Canterbury.
3. **Curtis L** (2013) *Unit Costs of Health and Social Care 2013*. Canterbury: Personal Social Services Research Unit.

For peer review only

## CHEERS checklist—Items to include when reporting economic evaluations of health interventions

| Section/item                    | Item No | Recommendation                                                                                                                                                                          | Reported on page No/<br>line No |
|---------------------------------|---------|-----------------------------------------------------------------------------------------------------------------------------------------------------------------------------------------|---------------------------------|
| <b>Title and abstract</b>       |         |                                                                                                                                                                                         |                                 |
| Title                           | 1       | Identify the study as an economic evaluation or use more specific terms such as “cost-effectiveness analysis”, and describe the interventions compared.                                 | P1                              |
| Abstract                        | 2       | Provide a structured summary of objectives, perspective, setting, methods (including study design and inputs), results (including base case and uncertainty analyses), and conclusions. | P1                              |
| <b>Introduction</b>             |         |                                                                                                                                                                                         |                                 |
| Background and objectives       | 3       | Provide an explicit statement of the broader context for the study.                                                                                                                     | P5-6                            |
|                                 |         | Present the study question and its relevance for health policy or practice decisions.                                                                                                   | P5-6                            |
| <b>Methods</b>                  |         |                                                                                                                                                                                         |                                 |
| Target population and subgroups | 4       | Describe characteristics of the base case population and subgroups analysed, including why they were chosen.                                                                            | P5-6                            |
| Setting and location            | 5       | State relevant aspects of the system(s) in which the decision(s) need(s) to be made.                                                                                                    | P5-6                            |
| Study perspective               | 6       | Describe the perspective of the study and relate this to the costs being evaluated.                                                                                                     | P5                              |
| Comparators                     | 7       | Describe the interventions or strategies being compared and state why they were chosen.                                                                                                 | P5                              |
| Time horizon                    | 8       | State the time horizon(s) over which costs and consequences are being evaluated and say why appropriate.                                                                                | P7                              |
| Discount rate                   | 9       | Report the choice of discount rate(s) used for costs and outcomes and say why appropriate.                                                                                              | N/A                             |
| Choice of health outcomes       | 10      | Describe what outcomes were used as the measure(s) of benefit in the evaluation and their relevance for the type of analysis performed.                                                 | N/A                             |

| Section/item                                           | Item No | Recommendation                                                                                                                                                                                                                                                                                                              | Reported on page No/<br>line No |
|--------------------------------------------------------|---------|-----------------------------------------------------------------------------------------------------------------------------------------------------------------------------------------------------------------------------------------------------------------------------------------------------------------------------|---------------------------------|
| Measurement of effectiveness                           | 11a     | <i>Single study-based estimates:</i> Describe fully the design features of the single effectiveness study and why the single study was a sufficient source of clinical effectiveness data.                                                                                                                                  | P25-7                           |
|                                                        | 11b     | <i>Synthesis-based estimates:</i> Describe fully the methods used for identification of included studies and synthesis of clinical effectiveness data.                                                                                                                                                                      | N/A                             |
| Measurement and valuation of preference based outcomes | 12      | If applicable, describe the population and methods used to elicit preferences for outcomes.                                                                                                                                                                                                                                 | N/A                             |
| Estimating resources and costs                         | 13a     | <i>Single study-based economic evaluation:</i> Describe approaches used to estimate resource use associated with the alternative interventions. Describe primary or secondary research methods for valuing each resource item in terms of its unit cost. Describe any adjustments made to approximate to opportunity costs. | P7-9                            |
|                                                        | 13b     | <i>Model-based economic evaluation:</i> Describe approaches and data sources used to estimate resource use associated with model health states. Describe primary or secondary research methods for valuing each resource item in terms of its unit cost. Describe any adjustments made to approximate to opportunity costs. | N/A                             |
| Currency, price date, and conversion                   | 14      | Report the dates of the estimated resource quantities and unit costs. Describe methods for adjusting estimated unit costs to the year of reported costs if necessary. Describe methods for converting costs into a common currency base and the exchange rate.                                                              | P7-9                            |
| Choice of model                                        | 15      | Describe and give reasons for the specific type of decision-analytical model used. Providing a figure to show model structure is strongly recommended.                                                                                                                                                                      | N/A                             |

| Section/item                   | Item No | Recommendation                                                                                                                                                                                                                                                                                                                                        | Reported on page No/<br>line No |
|--------------------------------|---------|-------------------------------------------------------------------------------------------------------------------------------------------------------------------------------------------------------------------------------------------------------------------------------------------------------------------------------------------------------|---------------------------------|
| Assumptions                    | 16      | Describe all structural or other assumptions underpinning the decision-analytical model.                                                                                                                                                                                                                                                              | N/A                             |
| Analytical methods             | 17      | Describe all analytical methods supporting the evaluation. This could include methods for dealing with skewed, missing, or censored data; extrapolation methods; methods for pooling data; approaches to validate or make adjustments (such as half cycle corrections) to a model; and methods for handling population heterogeneity and uncertainty. | P9-11                           |
| <b>Results</b>                 |         |                                                                                                                                                                                                                                                                                                                                                       |                                 |
| Study parameters               | 18      | Report the values, ranges, references, and, if used, probability distributions for all parameters. Report reasons or sources for distributions used to represent uncertainty where appropriate. Providing a table to show the input values is strongly recommended.                                                                                   | P11-12                          |
| Incremental costs and outcomes | 19      | For each intervention, report mean values for the main categories of estimated costs and outcomes of interest, as well as mean differences between the comparator groups. If applicable, report incremental cost-effectiveness ratios.                                                                                                                | P11-12                          |
| Characterising uncertainty     | 20a     | <i>Single study-based economic evaluation:</i> Describe the effects of sampling uncertainty for the estimated incremental cost and incremental effectiveness parameters, together with the impact of methodological assumptions (such as discount rate, study perspective).                                                                           | P12-16                          |
|                                | 20b     | <i>Model-based economic evaluation:</i> Describe the effects on the results of uncertainty for all input parameters, and uncertainty related to the structure of the model and assumptions.                                                                                                                                                           | N/A                             |
| Characterising heterogeneity   | 21      | If applicable, report differences in costs, outcomes, or cost-effectiveness that can be explained by variations between subgroups of patients with different baseline characteristics or                                                                                                                                                              | N/A                             |

| Section/item                                                         | Item No | Recommendation                                                                                                                                                                                                                                    | Reported on page No/<br>line No |
|----------------------------------------------------------------------|---------|---------------------------------------------------------------------------------------------------------------------------------------------------------------------------------------------------------------------------------------------------|---------------------------------|
|                                                                      |         | other observed variability in effects that are not reducible by more information.                                                                                                                                                                 |                                 |
| <b>Discussion</b>                                                    |         |                                                                                                                                                                                                                                                   |                                 |
| Study findings, limitations, generalisability, and current knowledge | 22      | Summarise key study findings and describe how they support the conclusions reached. Discuss limitations and the generalisability of the findings and how the findings fit with current knowledge.                                                 | P17-21                          |
| <b>Other</b>                                                         |         |                                                                                                                                                                                                                                                   |                                 |
| Source of funding                                                    | 23      | Describe how the study was funded and the role of the funder in the identification, design, conduct, and reporting of the analysis. Describe other non-monetary sources of support.                                                               | P1                              |
| Conflicts of interest                                                | 24      | Describe any potential for conflict of interest of study contributors in accordance with journal policy. In the absence of a journal policy, we recommend authors comply with International Committee of Medical Journal Editors recommendations. | P2                              |

For consistency, the CHEERS statement checklist format is based on the format of the CONSORT statement checklist
